# Supplementary material for: Laboratory analysis of volcanic ash particles using a 2D video disdrometer
Source: Copernicus journal article supplement (doi:10.5194/amt-2019-88), 2019-04-15
Supplement: Supplementary file [file amt-2019-88-RC1-supplement.pdf]

1 **Laboratory analysis** of volcanic ash particles using a 2D  
2 **video disdrometer**

3 **Sung-Ho Suh**<sup>1</sup>, Masayuki Maki<sup>2\*</sup>, Masato Iguchi<sup>3</sup>, Dong-In Lee<sup>1</sup>,  
4 Tatsuya Momotani<sup>4</sup>, and Akihiko Yamaji<sup>4</sup>

5  
6 Institutional addresses:

7 <sup>1</sup>Department of Environmental Atmospheric Sciences, Pukyong National University, Namgu, Busan,  
8 Republic of Korea

9  
10 <sup>2</sup>Research and Education Center for Natural Hazards, Kagoshima University, Korimoto, Kagoshima,  
11 Japan

12  
13 <sup>3</sup>Sakurajima Volcano Research Center, Disaster Prevention Research Institute, Kyoto University,  
14 Sakurajima, Kagoshima, Japan

15  
16 <sup>4</sup>Japan Weather Association, Higashi-Ikebukuro, Toshima-ku, Tokyo, Japan

17  
18 \* Corresponding author: Masayuki Maki ([maki@gm.kagoshima-u.ac.jp](mailto:maki@gm.kagoshima-u.ac.jp))

19 Key Points: Volcanic ash, 2DVD, aerodynamic properties, laboratory experiments

21 The English in this document has been checked by at least two professional editors, both native  
22 speakers of English. For a certificate, please see:

23

24 <http://www.textcheck.com/certificate/7pU3Ux>

25

26

27        **Abstract**

28        Radar variables of volcanic ash clouds are dependent on microphysical processes and can be  
29 expressed using physical parameters of volcanic ash particles, such as terminal velocity, axis ratio, and  
30 canting angle, which are necessary for quantitative ash-fall estimations. In this study, free-fall  
31 experiments of volcanic ash were accomplished using a two-dimensional video disdrometer under  
32 controlled conditions.

33        Samples containing a rotating symmetric axis were selected and divided into five types according  
34 to shape and orientation, i.e., oblate and prolate spheroids with horizontally and vertically oriented  
35 axes and spheres. The horizontally and vertically oriented particles were present in proportions of 75.5%  
36 and 21.6%, and oblate and prolate spheroids were in proportions of 76.2% and 23.8%, respectively.  
37 The most common shape type was a horizontally oriented oblate spheroid (57.3%).

38        The terminal velocities were classified according to shape type. The terminal velocities of prolate  
39 spheroids (vertically oriented) particles were higher than those of oblate spheroids (horizontally).  
40 Terminal velocities were in the range  $0.5 < \text{volume-equivalent spherical particle diameter (D)} < 1$  mm  
41 for OH because of an increase in axis ratio and a sharp decrease in sample size from  $D < 0.7$  mm. The  
42 axis ratios fell over a wide range, from 0 to 1.5, at  $D < 2$  mm, but converged to 0.94 at  $D > 2$  mm.

43        The histogram of canting angles followed unimodal and bimodal distributions with respect to  
44 horizontally and vertically oriented particles, respectively. The mean values were close to  $0^\circ$  and the  
45 standard deviation for the entire particle shape types was close to that of raindrops ( $10^\circ$ ) under calm  
46 atmospheric conditions.

47

## 1. Introduction

Volcanic eruptions are considered one of the most severe types of natural disasters, and can lead to human casualties and property damage (Wilson et al., 2012; Hillman et al., 2012; Sigurdsson et al., 2015; Wilson et al., 2015). Following an eruption, fine airborne volcanic ash flows for several tens of kilometers, which can cause major problems by increasing aviation traffic (e.g., Bonadonna et al., 2012; Langmann et al., 2012); this was seen after the eruption of Eyjafjallajökull volcano in Iceland during the period April 14– 21, 2010, for example (Bonadonna et al., 2011). From the viewpoint of volcanological hazard reduction, trajectory modeling of volcanic ash clouds is an important research topic. The aim of numerical forecasting modeling is to accurately predict the transport and deposition of ash, which is vitally important for hazard mitigation (Poulidis et al., 2017). Current numerical simulations consider the terminal velocity ( $V_T$ ) of particles and incorporate wind advection, atmospheric diffusion, and particle aggregation (Folch, 2012; Bonadonna et al., 2015). The  $V_T$  of a particle is affected by its shape, density particle volume fraction, and atmospheric properties, such as air pressure ( $P$ ), temperature ( $T$ ), and vertical flow (Wilson and Huang, 1979; Haider and Levenspiel, 1989; Ganser, 1993; Bonadonna et al., 1998; Riley, 2003; Dellino, 2005; Coltelli et al., 2008; Alfano et al., 2011; Del Bello et al., 2017). Observational analysis would be helpful for improving the performance of eruption models; however, there is limited information on the microphysical characteristics and inner structures of volcanic ash clouds (Marzano et al., 2006; 2012). Transport and sedimentation of volcanic ash are complex processes, and the residence time and fall velocity of ash is critically dependent on particle size (Bonadonna et al., 1998), where with respect to the latter, smaller particles could be flowing in the atmosphere further from the vent. Ash consists of very fine-grained fragments, volume-equivalent spherical particle diameter ( $D$  in  $\mu\text{m}$ ) is generally smaller than 2 mm, and these are generally dominated by broken glass shards rather than crystal and lithic fragments. Bombs, resulting from larger eruptions, may show vesicularity; they exhibit flexibility similar to

72 plastic when a volcano becomes active and erupts (Sparks et al., 1997; Marzano et al., 2006; 2012).  
73 The trajectories of volcanic ash clouds can be detected by meteorological satellites (Stevenson et al.,  
74 2015), and the ash amounts can be observed using a ground-based paper cup and an electronic balance  
75 (Tajima et al., 2015, Maki et al., 2016). Covering the middle latitudes of the entire globe, geostationary  
76 meteorological satellites are able to detect water clouds over the ocean, even when they are far from  
77 land; they are also more capable of detecting the upper layers of weather systems, such as convective  
78 cells and typhoons, than other weather observational instruments, albeit with relatively low spatial  
79 resolution (a few kilometers). When operating in near-polar orbiting mode, these sensors have higher  
80 spatial resolution but are limited by their lower temporal resolution, and only pass over a given area  
81 twice per day. Weather radar operates for a similar purpose to that of meteorological satellites, and  
82 provides information for determining the volume, mass, and echo top height of weather systems. Short-  
83 duration eruptions, i.e., less than 1 hour, can be detected at high spatio-temporal resolution, especially  
84 in the early period of an eruption. The temporal resolution of weather radar is a few minutes for a  
85 single volume scan, and depends on the observation strategy and radar band. The spatial resolution of  
86 weather radar is a few hundred meters and is proportional to the radar frequency. A number of ash  
87 cloud detections were reported in several observational cases in the US and Japan (Maki and Doviak,  
88 2001; Maki et al., 2012). Marzano et al. (2013) summarized 28 major explosive volcanic eruptions  
89 detected by weather radars from 1970 to 2011.

90 Harris and Rose (1983) attempted to analyze volcanic ash particle size and total mass using a C-  
91 band weather radar. Maki and Doviak (2001) found that a weather radar could measure the radar  
92 reflectivity factor ( $z$  in  $\text{mm}^6 \text{ m}^{-3}$ ) of volcanic ash columns and Donnadieu et al. (2012) detected  
93 volcanic eruptions using an L-band fixed radar. Marzono et al. (2006, 2012) and Maki et al. (2012,  
94 2014) detected and analyzed volcanic eruptions using weather radars, from theoretical (physical) and  
95 experimental (engineering) perspectives. These weather radars were developed to detect hydrometeors

96 with a size range from millimeters to centimeters. Coarse particles ( $D < 0.53$  mm) can be detected by  
97 weather radars. Coarse volcanic ash particles are deposited rapidly following an eruption within a few  
98 tens of kilometers from the vent (Bonadonna et al., 1998; Beckett et al., 2015); however, smaller  
99 particles, such as fine ash ( $D < 64$   $\mu\text{m}$ ), are transported over distances of several thousands of  
100 kilometers and cannot be detected by operational weather radar, since the minimum detectable  
101 reflectivity (MDR) of radar is inversely proportional to the distance between the radar and the target,  
102 and where this depends on the wavelength of the transmitted wave (Sauvageot, 1992; Maki et al., 2016).

103 Weather radars require detailed information on the following basic parameters: particle size  
104 distribution (PSD), particle density ( $\rho_s$  in  $\text{g cm}^{-3}$ ), dielectric constant ( $|K|^2$ ),  $V_T$  (in  $\text{m s}^{-1}$ ), axis ratio ( $\gamma$ ),  
105 and canting angle ( $\beta$  in  $^\circ$ ) to estimate ash amount quantitatively, and these can all be observed by a  
106 ground-based instrument. The PSD is controlled by the microphysical processes of the volcanic  
107 eruption system and plays an important role in its development; it is also essential for accurate  
108 evaluation of the backscattering and absorption of particles (Seliga and Bringi, 1976; Marzano et al.,  
109 2006; 2012), which affect the radar variables. There are two basic PSD models: i) the gamma size  
110 distribution following the gamma function ( $\Gamma$ ) and ii) the Weibull size distribution, mainly applied as  
111 a log-normal PSD. The former is as a well-known reference in radar meteorology. For precipitation,  
112 several raindrop size distribution (DSD) models can be used in a variety of cases (e.g., Ulbrich, 1983;  
113 Testud et al., 2001). This implies that a disdrometer is necessary to analyze the observed radar variables  
114 and evaluate them in a scattering simulation.

115 The ashfall rate ( $R_A$ ) can be also defined in terms of the  $V_T$  and is determined by  $\rho_s$ , shape, and  
116 orientation (Ganser, 1993; Hölzer and Martin Sommerfeld, 2008; Mandø and Rosendahl, 2010;  
117 Bagheri and Bonadonna, 2016; Dioguardi et al., 2017). The  $V_T$  of particles vary widely due to their  
118 irregular shapes and material components (e.g., Wilson, 1972; Harris and Rose, 1983; Bonadonna et  
119 al., 2011, Maki et al., 2016)

120 Volcanic ash particles have a range of shapes, and this presents a major challenge when analyzing  
121 their characteristics. To address this, Böhm (1989) analyzed the aerodynamic properties of an irregular  
122 hydrometeor and Huang (2010, 2015) applied this concept to snow particles. Recently, the irregularity  
123 of volcanic ash particles was analyzed in detail based on the features of various regular particles, such  
124 as cubes, cylinders, and disks (Bagheri and Bonadonna, 2016), using a computed tomography (CT)  
125 scanner (Dioguardi et al., 2017; Garboczi et al., 2017).

126 The particle shape observed by radar depends on oscillation or tumbling and can be expressed  
127 quantitatively using the  $\beta$ . Research on the  $\beta$  of volcanic ash based on meteorological radar is scarce.  
128 Marzano et al. (2012) assumed that the standard deviations of the canting angle ( $\sigma_\beta$ ) were  $30^\circ$  and  $10^\circ$   
129 under unstable conditions (in which the tumbling phenomenon may occur) and stable conditions,  
130 respectively. For the case of raindrops, the mean value of the canting angle ( $\bar{\beta}$ ) is close to  $0^\circ$  and  $\sigma_\beta$   
131 ranged from  $4^\circ$  to  $10^\circ$  (Beard and Jameson, 1983; Hendry et al., 1987; Huang et al., 2008; Ryzhkov et  
132 al., 2011). Solid hydrometeors, such as snowflakes and hail, exhibited different features compared to  
133 the liquid phase. The  $\sigma_\beta$  values for graupel, rimed particles, and aggregations were  $20^\circ$ ,  $16^\circ$ , and  $13^\circ$ ,  
134 respectively (Garrett, 2015). Hail that occurs in the context of the tumbling phenomenon is described  
135 by  $\bar{\beta} = 60(1-f_w)$ , where  $f_w$  is the wetting ratio (Synder et al., 2013; Jung et al., 2008). It is assumed  
136 that the existence of a liquid phase water covering on the particles reduces the tumbling/oscillations  
137 phenomenon.

138 The  $|K|^2$  of the particle depends on the chemical components and phase. Water and ice  
139 hydrometeors have quite different values of  $|K|^2$ , of 0.93 and 0.19, respectively, where the value  
140 depends on the radar frequency and T. Volcanic ash has a silicate content proportional to the  $|K|^2$ ,  
141 resulting in various values of  $|K|^2$ , such as 0.34 and  $0.39 \pm 0.02$  (Adam et al., 1996; Marzano et al.,  
142 2006; Oguchi et al., 2009).

143 Aerodynamic properties are important for safe aviation, and for studying the effects of volcanic  
144 ash on climate change, since these parameters determine the residence time of ash particles in the  
145 atmosphere (e.g., Folch et al., 2009). There are two approaches to studying these aerodynamic  
146 properties. The first approach is physical, where a numerical simulation model is used to calculate  
147 terminal velocities, drag force, and Reynolds number ( $Re$ ); examples of this approach can be found in  
148 Happel and Brenner (1983). Scattering simulations of particles may be aided by the results of the  
149 present study, allowing accurate detection of ash fall by weather radar; this could help verify observed  
150 radar variables. In particular, the T-matrix scattering simulation developed by Waterman (1965, 1971)  
151 is useful for calculation of the theoretical backscattering power of non-spherical particles. The second  
152 approach is related to engineering research, in which the aforementioned relationships are determined  
153 experimentally; examples of this approach can be found in Dellino et al. (2005), Bagheri et al. (2013),  
154 Bagheri and Bonadonna (2016), and Dioguardi et al. (2018). Particle dispersion depends on  
155 atmospheric conditions, such as  $T$  and wind, which can affect the retrieval of basic parameters. It is  
156 suggested that these parameters be analyzed through free-fall laboratory experiments, to reduce  
157 unknown information and obtain reliable results.

158 The present study focuses on the second approach, and its purpose is to analyze the physical  
159 parameters of volcanic ash particles statistically using a ground-based disdrometer, and to develop  
160 quantitative ash-fall estimation (QAE) methods for accurate detection of volcanic ash clouds by  
161 weather radar. The rest of this paper is organized as follows. Section 2 introduces the free-fall  
162 experiment for samples collected with a ground-based disdrometer and the classification method for  
163 particle shapes. Section 3 presents the  $V_T$ ,  $\gamma$  and  $\beta$  results for each type of volcanic ash particle shape.  
164 Section 4 summarizes the results.

165



## 2. Data and Methods

### a. Two dimensional (2D) video disdrometer

The 2D video disdrometer (2DVD) was developed by Joanneum Research (Graz, Austria) to detect single raindrop particles, and the instrument has been modified to cover the errors caused by turbulence effects (Nešpor et al., 2000). The device is able to observe the shape,  $V_T$ , and  $\beta$  of a single particle using optical light. The ability to analyze a single particle is a significant advantage compared to other disdrometers, such as the Joss-Waldvogel disdrometer (JWD), the Precipitation Occurrence Sensor System (POSS), and Parsivel (PARTicle Size and VElocity). For instance, Parsivel considers a fixed measurement area without any consideration of particle shape (e.g., Tokay et al., 2014), while 2DVD observes particles by passing them through a 100 cm<sup>2</sup> observation area consisting of two light sources and reflecting mirrors and two cameras, one set 6.2 mm above the other, and collects data with a resolution of 630 pixels; this results in a pixel size of 0.2 mm at 55 kHz (Kruger and Krajewski, 2002). Particles passing through the observation area yield shape information according to the radiation intensity of the light sources, which is helpful for calculation of  $\gamma$  and  $\beta$ . The  $V_T$  of particles is calculated using the height difference between the two cameras. Based on these advantages, the oscillation and particle shape of raindrops can be analyzed by 2DVD (Thurai and Bringi, 2005; Thurai et al., 2007). Huang et al. (2010, 2015) used 2DVD to analyze the features of irregularly shaped snow. There have been few previous aerodynamic analyses of volcanic ash particles performed using 2DVD, which is able to detect and analyze volcanic ash particles with a range of irregular shapes. Thus, 2DVD offers a unique approach as a new observation strategy.

### b. Definition of particle shape type

190 Volcanic ash particles have various shapes that can be detected by 2DVD (Fig. 1). In the case of  
 191 raindrops, the DSD is dependent upon the break-up and coalescence processes occurring via up and  
 192 downdrafts, since the forces of gravity and buoyancy can easily affect raindrop shapes (Rosenfeld and  
 193 Ulbrich, 2003). Solid particles do not readily change shape when falling without the influence of forces  
 194 such as collision. It is thus inferred that many particle shapes would be found in the atmosphere, and  
 195 that it would be possible to define and classify each particle shape type if we were able to accurately  
 196 detect a single particle. Thus, the range of  $\gamma$  for solid particles would be expected to be wide compared  
 197 to that of raindrops, and various values of  $V_T$  and  $\beta$  would likely be observed. The  $\gamma_x$  of a particle is  
 198 defined as the ratio of height to width for the observation direction  $x$ , and its representative value is  
 199 calculated using the geometric means of the two  $\gamma$  ( $\gamma_1, \gamma_2$ ) detected by cameras 1 and 2, respectively  
 200 (Eq. 1):

$$\gamma_{1(2)} = \frac{\text{Height}_{1(2)}}{\text{Width}_{1(2)}}, \quad \gamma = \sqrt{\gamma_1 \gamma_2}$$

Eq. (1).

206 The  $\beta$  is defined as the difference in angle between the rotating symmetric axis and vertical axis.  
 207 The counter-clockwise (clockwise) movement of the rotating symmetric axis has a positive (negative)  
 208 value and the entire range is  $180^\circ$  (from  $-90^\circ$  to  $90^\circ$ ) with  $0^\circ$  as the center.

209 It is necessary to consider the true axis ratio ( $\gamma_T$ ) to correctly define the particle shape (Fig. 2). The  
 210 apparent axis ratio ( $\gamma_A$ ) considers the effect of  $\beta$  but the  $\gamma_T$  does not. The 2D coordinates ( $x, z$ ) of the  
 211 particle shape with  $\beta$  are defined as follows:

212

213  $x_A = r \cos(\theta + \beta), \quad z_A = r \sin(\theta + \beta)$

214

215  $x_T = r \cos\theta, \quad z_T = r \sin\theta$

216

217 where subscript A is the coordinate of the original data coordinate considering the  $\beta$  and subscript  
218 T is the modified data coordinate. The symbol r refers to the length from the data point to the center  
219 and the symbol  $\theta$  represents the degrees of data coordinates from the positive x axis, which range  
220 between  $0^\circ$  and  $180^\circ$ . In this paper,  $\gamma$  stands for  $\gamma_A$  for convenience.

221 An objective criterion for particle shape type was considered since particle shapes can be highly  
222 diverse and irregular (e.g., Bagheri and Bonadonna, 2016, Dioguardi et al., 2017; Garboczi et al., 2017,  
223 Dioguardi et al., 2018). In the case of irregular particles, the  $\gamma$  can change according to the observation  
224 direction; however, any criterion should be able to define the particle shape types strictly and reliably.  
225 To solve this problem, particles with a rotating symmetric axis were the main target of the present  
226 study. Therefore, we considered oblate spheroid (O), prolate spheroid (P), and sphere (Sp), which all  
227 have a rotating symmetric axes. Among these particle types, the major axes of the oblate and prolate  
228 spheroids could be horizontally (H) and vertically (V) oriented with respect to the ground, respectively.  
229 Thus, the various particle shapes were divided into five types as follows; OH, OV, PH, PV, and Sp.

230 To define these particle shape types, a strict definition of the  $\gamma_T$  is required, which can be calculated  
231 from the  $\beta$ . As with the  $\gamma$ , the two  $\beta$  values are automatically calculated by 2DVD. In the case where  
232 the  $\beta$  is assumed as  $0^\circ$ , the rotating symmetric axis for OH and PV can be defined, since it is observed  
233 for any observation direction parallel to the ground. However, in the case of OV and PH particles, the  
234 rotating symmetric axis cannot be defined when the observation direction is parallel. In the case where  
235 the  $\beta$  is not  $0^\circ$ ,  $\gamma_T$  for all particle shape types would not change when oscillation occurs in a direction  
236 orthogonal to the observation direction, but it is difficult to estimate both  $\gamma_T$  and  $\beta$  when particle

237 oscillation appears in a direction parallel to the observation direction. The ability to restore the  $\gamma_T$  and  
238  $\beta$  relative to this observation direction is limited, which is one of the main disadvantages of the 2D  
239 observation strategy.

240 Based on these facts, a major  $\beta$  was selected based on the following reasoning: i) a  $\beta$  for the  
241 observation direction with lower (higher)  $\gamma_T$  for OH (PV) is selected. ii) in the case of OV (PH), for  
242 which the rotating symmetric axis was observed for only one observation direction,  $\beta$  was considered  
243 where the value of  $\beta$  had a higher (lower)  $\gamma_T$  than that of the other observation direction. Therefore,  $\beta$   
244 with a lower (higher)  $\gamma_T$  in two observation directions for the case of an oblate (prolate) particle was  
245 considered as a meaningful value. The Sp could not have their value of  $\beta$  determined theoretically,  
246 because there is the possibility of a rotating symmetric axis in any direction.

247 After removing  $\beta$ , each particle shape was defined using  $\gamma_T$  (Table 1). Note that a 10% bias range  
248 was allowed, to take observational error into account. For example, a particle was considered as a  
249 sphere when  $0.9 < \gamma_T < 1.1$ , which is an applied 10% bias range from  $\gamma_T = 1$ . In addition, the particle  
250 types OH and PV (OV and PH) were classified when the value of  $|\gamma_1 - \gamma_2|$  was smaller (larger) than  
251  $0.1\gamma_T$ , to consider particles with only a rotating symmetric axis.

252

253

### 254 **c. Calculate the terminal velocity for the various particle shape types**

255 The  $V_T$  of volcanic ash is required to estimate the  $R_A$  ( $\text{kg m}^{-2} \text{s}^{-1}$ ) on the ground where this depends  
256 on atmospheric density ( $\rho_g$  in  $\text{g cm}^{-3}$ ),  $T$ ,  $Re$ , drag coefficient ( $C_D$ ),  $D$ , shape, and  $\rho_s$ . Kunii and  
257 Levenspiel (1969) developed a theoretical  $V_T$  equation:

258

$$259 \quad V_T = \left( \frac{4(\rho_s - \rho_g)gD}{3\rho_g C_D} \right)^{0.5} \quad (10^0 < Re < 10^4)$$

Eq. (2)

Later, Suzuki (1983) developed a theoretical  $V_T$  equation for tephra. Bonadonna et al. (2011) then modified the theoretical  $V_T$  equation suggested by Kunii and Levenspiel (1969) with observed ash data, which implied that the result of the theoretical  $V_T$  equation could be unsuitable for non-spherical particles. Based on these equations, various  $C_D$  equations considering non-spherical particles were subsequently developed. Tran-Cong et al. (2004) developed a new equation for  $C_D$  using the function of circularity and Hölzer and Somerfeld (2008) introduced a progressed  $C_D$  equation considering two types of sphericity: lengthwise ( $\Phi_{||}$ ) and crosswise ( $\Phi_{\perp}$ ). This equation is as follows:

$$C_D = \frac{8}{Re} \frac{1}{\sqrt{\Phi_{||}}} + \frac{16}{Re} \frac{1}{\sqrt{\Phi}} + \frac{3}{\sqrt{Re}} \frac{1}{\Phi^{3/4}} + 0.42 \times 10^{0.41(-\log(\Phi))^{0.2}} \frac{1}{\Phi_{\perp}}$$

Eq. (3)

The  $Re$  is defined as:

$$Re = \frac{\rho_g V_T D}{\mu}$$

Eq. (4)

where  $\mu$  is the dynamic viscosity ( $\text{kg m}^{-1} \text{s}^{-1}$ ), which we assumed to be  $1.983 \times 10^{-5}$  based on atmospheric conditions at a  $T$  of  $25 \text{ }^\circ\text{C}$ . Three types of sphericity were defined as follows:

$$\Phi = \frac{\pi D^2}{SA}$$

Eq. (5)

where SA is the surface area of the particle (mm<sup>2</sup>). The lengthwise sphericity is defined as the ratio between the cross-sectional area of the volume-equivalent sphere and the difference between half the surface area and the mean of the projected vertical cross-sectional area ( $A_V$ ) of the particle (Eq. 6):

$$\Phi_{\parallel} = \frac{\pi D^2}{4(0.5 \times SA - A_V)}$$

Eq. (6)

The crosswise sphericity is the same as the lengthwise sphericity, except for the denominator, which includes the projected horizontal cross-sectional area of the particle ( $A_H$ ), defined as follows:

$$\Phi_{\perp} = \frac{\pi D^2}{4A_H}$$

Eq. (7)

It is noteworthy that the  $V_T$  is required to calculate the Re and  $V_T$ , which refers to the final product. To solve this problem, the theoretical  $V_T$  (Eq. 2) was used as the input value of Eq. 4 until Eq. 2 converged.

#### **d. Sakurajima volcano**

Japan has around 10% (110) of all of the active volcanos in the world. Sakurajima (1,117m, 31.58° N, 130.65° E, Kyushu, Japan) is an active volcanic island formed around 13,000 years ago, and its

305 tephra is approximately 57–66 %  $\text{SiO}_2$  Peléan-type. The major eruptions periods of Sakurajima were  
306 1471–1476 (Bunmei era), 1779–1782 (An-ei era) and 1914 (Taisho era). The Japan Meteorological  
307 Agency (JMA) reported that the eruption frequency of Sakurajima would increase significantly from  
308 2009 (Maki et al., 2014) and the accumulated ash fall exceeded  $3.5 \text{ kg m}^{-2}$  in Kagoshima city in 2012  
309 (Maki et al., 2016). The Ministry of Land, Infrastructure, Transport, and Tourism (MLITT) installed  
310 an operational X-band radar 10.7 km from the vent, as well as 16 automatic volcanic ash weight  
311 measurements, to observe volcanic eruptions in 2011 (Fig. 3).

312

313

#### 314 **e. Data collection and reanalysis**

315 The data were collected by automatic volcanic ash weight measurements performed on the  
316 Sakurajima volcano (Tajima et al., 2015; Maki et al., 2014; 2016). The free-fall experiments were  
317 divided into two types; one was performed for each phi scale ( $\Phi = -\log_2 D$ ) from  $\Phi = 3$  to  $-4$  ( $0.125 <$   
318  $D < 16 \text{ mm}$ ), and the other was not considered on a particle size scale. The former data, expressed by  
319 A and B (Type 1), were collected at two sites and reanalyzed by size (Fig. 4); the latter data, expressed  
320 as C–E (Type 2), were collected at 18 sites (Table 2). Free-fall experiments on collected volcanic ash  
321 particles were carried out in the large-scale rainfall simulator of the National Research Institute for  
322 Earth Science and Disaster Prevention (NIED) in Tsukuba, Japan. The collected particles were dropped  
323 manually by a manager around 17 m from the ground and re-collected by a third-generation 2DVD  
324 (Maki et al., 2016). Half a cup of each sample was dropped for 30 s to stimulate dispersion, and the  
325 measurement period was 1 min. To avoid wind effects including turbulence, the 2DVD was surrounded  
326 by a  $27 \text{ m}^3$  windbreaking wall (Fig. 5).

327 The free-fall experiments were conducted at intervals of 1 min over 6 h 30 min, as shown in Fig.  
328 6. The number of particles detected by 2DVD was less than 10,000 for 1 min, and the particle size

329 range of **The** former data set (A, B) was proportional to its phi-scale, since small particles may be  
330 observed in collisions or break-up from aggregates. Bonadonna et al. (2011) showed that the dominant  
331 distribution areas of volcanic ash particles of  $\Phi = 1\sim 2$ ,  $1\sim 3$ , and  $3\sim 9$  corresponded to around 10, 20,  
332 and 30 km from the vent of Eyjafjallajökull, Iceland, respectively. Dellino et al. (2012) reported that  
333 the dominant volcanic ash particle size is centered at  $\Phi = 0\sim 3$  and  $1\sim 2$  at 3 and 9 km from the vent  
334 of the same volcano, respectively. Based on these studies, the results of the present study represent the  
335 range between 2 and 20 km from the vent under natural conditions.

336 Figure 7 shows the distribution of raw data (the number of data: 274,215) for  $V_T$  and  $\gamma$  with  $D$ .  
337 There were various  $\gamma$  values, from 0 to 2, when the volume-equivalent particle  $D < 2$  mm, and most of  
338 the data were concentrated near 0. The  $\gamma$  values converged around 1 and their distributional range  
339 decreased with  $D$ . It should be noted that this feature is different from that of raindrops, where smaller  
340 raindrops converge around 1 and gradually decrease with  $D$  (Thurai and Bringi, 2005). Beard and  
341 Chuang (1987) and Andsager et al. (1999) suggested that these raindrop features denote polynomial  
342 relationships (Fig. 7a). The median value with a 0.25 mm  $D$  interval corresponded well to the center  
343 of the data contour. The median line converged around  $\gamma = 0.93$  based on the correlation coefficient  
344 value (CC). When this was higher than 0.95 for each  $D$  interval, the data converged. According to this  
345 condition, the range of  $2 < D < 5$  mm was satisfied and the mean value was calculated using these data.

346 The  $V_T$  had a wider range when  $D < 2$  mm but the median line corresponded well to the center of  
347 the data (Fig. 7b). The line representing the largest amount of data is higher than the  $V_T$  of raindrops  
348 suggested by Atlas et al. (1973), and lower than the volcanic ash discussed by Bonadonna et al. (2011).

349 To select a reliable range for particle  $D$ , a theoretical terminal velocity equation ( $V_{T,Ref}$ )  
350 corresponding to Eqs. 2–7 was used as the reference. The particle density associated with the eruption  
351 of Sakurajima volcano is between 2.43 and 2.59 g cm<sup>-3</sup> (Oguchi et al., 2009), but the actual particles  
352 contain air vacuoles (Van Eaton et al., 2012). This means that the bulk density, including vacuoles, is



353 smaller than the particle density. Therefore, the minimum particle density was considered to be 2.43 g  
354  $\text{cm}^{-3}$ , and this was used as an input parameter. The atmospheric conditions of T and P were considered  
355 using ground observation data from automatic weather stations (AWS), supported by the JMA. The  
356 falling height of a particle when  $D = 4$  was lower than that under laboratory conditions when it reached  
357 90% of  $V_T$  (13.9 m) (17 m); therefore, the available data range is considered to be  $D \leq 4$  mm, and this  
358 would satisfy a steady-state oscillation. The detailed equations used in the present study are shown in  
359 Appendix A.

360

361

#### 362 **f. Quality control procedures**

363 The 2DVD was originally developed to detect raindrop hydrometeors. For this reason, additional  
364 quality control (QC) checks were deemed necessary to ensure applicability to non-hydrometeors, such  
365 as volcanic ash particles. Specifically, we performed the following two QC procedures for accurate  
366 analysis of the data:

367 i) Particle  $D > 0.25$  mm was selected in consideration of the minimum spatial resolution of 2DVD.

368 ii) If the major axis observed by 2DVD was 10% longer than that of the value calculated directly  
369 based on data coordinates, the data were considered erroneous and thus removed. A 10% bias range  
370 was considered based on mathematical error, the irregular particle shape, and the limitation of the  
371 spatiotemporal resolution of 2DVD.

372 iii) Based on the definition of  $\beta$  (Fig. 2), the perfect condition with respect to ellipsoids is satisfied  
373 when  $|\beta| = 0^\circ$  ( $90^\circ$ ) for OH and PV (OV and PH); these values are defined as the center values. However,  
374 2DVD calculated that the  $\beta$  for each particle shape type was concentrated around  $|\beta| = 0^\circ$  ( $90^\circ$ ) with  
375 respect to horizontally (vertically) oriented particles, which correspond to OH and PH (OV and PV).  
376 Furthermore, analysis of particles with an orthogonal center angle from  $0^\circ$  is difficult, since they have

377 two center angles ( $\pm 90^\circ$ ). To address observation errors and enhance the convenience of analysis, all  
378 center angles were set to  $|\beta| = 0^\circ$  and modified to give the representative canting angle,  $\beta_R$ , using the  
379 following equation:

380

$$381 \quad \beta_R = \beta - \beta_0$$

382

383 where  $\beta_0$  is the orienting angle, defined by the central angle of oscillation. In the case of vertically  
384 oriented particles (OV and PV),  $\beta_0$  could be defined as  $\pm 90^\circ$ . The sign of  $\beta_0$  follows that of  $\beta$ . After  
385 selecting the particle shape types and applying these QC procedures, 19.31% of the data (62,953)  
386 remained (Table 1).

387

388

### 389 **3. Results**

390

#### 391 **a. Size and shape distribution**

392 The particle size distribution over the entire volcanic ash sample was skewed leftward, and the  
393 particle shape distribution differed with particle size (Fig. 8). The particles were predominantly  
394 horizontally oriented (75.51%) or vertically oriented (21.60%). Oblate and prolate spheroids made up  
395 76.26% and 23.85% of the particles, respectively. Hence, the particles were mainly OH (57.38%) or  
396 PH (15.88%) (Table 2). The particles were predominantly  $0.25 < D < 0.5$  mm (63.00%) or  $0.5 < D <$   
397  $1$  mm (32.80%). Relatively few particles had  $D > 1$  mm (4.20%).

398 There was large variation in shape among particles  $0.25 < D < 0.5$  mm, but the variation decreased  
399 with increasing  $D$ . All of the particle shape types had the largest number of particle at  $D > 1.0$  mm and  
400 the next were shown at  $0.5 < D < 1.0$  mm, except for OH. In total, 95.80% of OH particles had  $D < 1$   
401 mm; at  $D < 0.5$  mm, the value was 75.68%, and at  $D = 0.5$ – $1$  mm, it was 22.36%. In the cases of PH  
402 and OV, 93.63% and 93.87% of these particles, respectively, had  $D < 1$  mm. Beyond  $D > 1$  mm, the  
403 differences in the number of particles for each particle shape type were considerably decreased. The  
404 PSD of volcanic ash particles depended on the distance from the vent (Beckett et al., 2015; Stevenson  
405 et al., 2015). Based on the results, this particle size and shape distribution would represent the area  
406 located over 2–20 km from the vent.

407

408

#### 409 **b. Terminal velocity**

410 It is difficult to apply qualitative analysis approaches to  $V_T$  since it depends on the scale, magnitude,  
411 and duration of an eruption. Furthermore, it is impossible to develop a model of  $V_T$  without knowledge

412 of the aerodynamic properties of the volcanic ash particles, since  $V_T$  is a function of the density, shapes,  
413 and oscillations of particles. In this study, we analyzed the basic features of volcanic ash particles in a  
414 laboratory experiment to obtain reliable results.

415 The observed values of  $V_T$  were well classified by particle shape and were generally higher than  
416 those of raindrops, as previously suggested by Atlas et al. (1973) (Fig. 9). The values were estimated  
417 using a multiple regression analysis, with  $V_T$  defined for each particle type, and with additional QC  
418 measures applied. If we consider a single  $V_T$  QC measure for the entire particle types, a number of  
419 available data might be removed, since  $V_T$  critically depends on particle shape. Therefore, we applied  
420 a  $\pm 60\%$   $V_T$  QC threshold (Jaffrain et al., 2011).

421 The highest values of  $V_T$  were recorded in the order of prolate, sphere, and oblate. Vertically  
422 oriented particles had higher  $V_T$  values than horizontal ones. For raindrops with a single particle shape  
423 type,  $V_T$  changes with atmospheric conditions, especially vertical air motion (Kim and Lee, 2016).  
424 However, the  $V_T$  values for volcanic ash particles change independent of external conditions, since  
425 they have various particle shapes. The  $V_T$  for every particle type was considered to be in a power-law  
426 form, except for OH. OH particles followed the regression line relatively closely, and showed the  
427 highest CC and root mean square error (RMSE) values, of 0.94 and 0.46  $\text{m s}^{-1}$ , respectively.  
428 Horizontally orientated particles had relatively higher correlations (OH: 0.94, PH: 0.87) compared to  
429 those with a vertical orientation (OV: 0.75, PV: 0.71). All of these data are summarized in Table 3.

430 To verify the reliability of the particle data obtained by 2DVD, which was originally developed to  
431 detect liquid raindrops, particle density,  $C_D$ , and  $Re$ , as well as theoretical  $V_T$  values according to these  
432 parameters, were analyzed. To calculate the parameters of interest, including the surface area and  
433 cross-sectional area of irregular particles, we applied the irregular particle volume estimation equations  
434 of Huang et al. (2010).

435

436

437 **c. Aerodynamic properties**

438 Particle densities were estimated using the  $V_{T,Ref}$ , converged to  $2.37 \text{ g cm}^{-3}$  when  $D < 1.5 \text{ mm}$  (Fig.  
439 10a). This value corresponds well to that of the minimum particle density ( $2.44 \text{ g cm}^{-3}$ ) reported by  
440 Oguchi et al. (2009). The slight difference is likely due to observation errors and the presence of  
441 vesicles (e.g., Seligman et al., 2016). The median value of particle density is changed to  $0.5 < D < 1.5$   
442 mm, and this range corresponds to that of  $V_T$ . Horizontally oriented particles (OH and PH) have  
443 relatively smaller particle density and vertically oriented particles (OV and PV) have higher density  
444 (Fig. 10b); spheres have particle densities that accord best with  $D$ . The median particle density values  
445 for all particle shapes converged when  $D < 2 \text{ mm}$ , and the converged particle density values ranged  
446 from  $2.35$  to  $2.50 \text{ g cm}^{-3}$ .

447 The  $Re$  and  $C_D$  for the all particle shapes ranged from 10 to 4,000 and 0.6 to 20, respectively (Fig.  
448 11a). Higher values of  $C_D$  were observed when  $Re < 70$ ; above this threshold,  $C_D$  dramatically  
449 decreased. These results were derived according to the number of OH particles, which mainly had  $D$   
450  $< 0.5 \text{ mm}$ , and had higher  $C_D$  and lower  $Re$ . Particle shape was divided into two types: OH and others  
451 (Fig. 11b). OH particles had higher  $C_D$  compared to the other particle shapes, which in turn showed  
452 few differences among themselves. The OH particles experience strong drag forces under the same  
453 flow conditions, leading to lower  $V_T$ . The differences between OH and other particles diminished with  
454  $Re < 1,000$ . The other particle shapes had relatively higher  $C_D$  in the range  $10 < Re < 3,000$ . Rong et  
455 al. (2015) analyzed the relationship between  $Re$  and  $C_D$  for oblate and prolate particles, and showed  
456 that OH particles had higher  $C_D$  compared to the reference line (Clift and Gauven, 1971) in the range  
457  $0 < Re < 400$ . Each relationship is summarized in Fig. 11.

458

459

460 **d. Axis ratio**

461 The  $\gamma$  of a particle affects the backscattering power of electromagnetic waves, and it is necessary  
462 to calculate the horizontal reflectivity ( $Z$  in dBZ), differential reflectivity ( $Z_{DR}$  in dB), and specific  
463 differential polarization phase shift ( $K_{DP}$  in  $^{\circ} \text{ km}^{-1}$ ). Note that previous studies have analyzed the  $\gamma$   
464 distribution for raindrops and snow, including hail; however few studies have been reported on  
465 volcanic ash.

466 Smaller raindrop particles exhibit higher values of  $\sigma$ . However, most of the particles are  
467 concentrated around  $\gamma = 1$  when  $D$  is close to 0 mm, and the  $\gamma$  for raindrops was shown to be inversely  
468 proportional to  $D$  (e.g., Pruppacher and Beard, 1970; Beard and Chuang, 1987; Goddard et al. 1994b;  
469 Andsager et al. 1999; Thurai and Bringi, 2005). Snowflakes showed linear relationships of  $\gamma$  and  $D$   
470 that were different from those of raindrops. Brandes et al. (2007) suggested that an equation for  $\gamma$  where  
471 ( $D$ ) =  $0.01714D + 0.8467$ . Hail had a similar  $\gamma$  to snowflakes, of 0.77 (Matson and Huggins, 1980)  
472 versus  $0.75 < \gamma < 0.79$  (Jewell and Brimelow, 2009), respectively.

473 Figure 12 shows the quartiles and median values of  $\gamma$  for the entire particle shapes, and for each  
474 individual particle shape type. The  $\gamma$  had a higher standard deviation ( $\sigma_{\gamma}$ ) of  $> 0.25$  when  $D < 0.75$  mm,  
475 which decreased and converged to  $\sigma_{\gamma} = 0.15$  when  $D > 1$  mm (Fig. 12a). The  $\gamma$  in the lower  $\sigma_{\gamma}$  range  
476 converged to  $\gamma = 0.94$  and could be expressed as follows:

477

$$478 \quad \gamma(D) = 0.94 - 0.25\exp(-1.90 D)$$

479 Eq. (8)

480 The particles are more easily classified by shape than by  $V_T$  (Fig. 12b). Every particle shape type  
481 was independent of  $D$ , except for OH. The relationships of the particle shape types are expressed as  
482 follows (Eqs. 9–12):

483

484 
$$\gamma(D)_{OH} = 0.37 \tanh(1.84D - 1.88) + 0.38$$

485 Eq. (9)

486 
$$\gamma_{OV} = 1.15$$

487 Eq. (10)

488 
$$\gamma_{PH} = 0.88$$

489 Eq. (11)

490 
$$\gamma_{PV} = 1.24$$

491 Eq. (12)

492

493 The parameter  $\gamma(D)_{OH}$  was calculated using the hyperbolic tangent (tanh) for the following reasons:

494 i) its range of values was wider than those of other particle types; ii) the data distribution changed  
495 continuously with D; and iii) it was present in a higher proportion (30.44%) compared to the other  
496 parameters. We found that variations in  $\gamma$  decreased with D and the proportion of Sp shapes increased  
497 when  $D > 2$  mm. The particle types OV and PH showed a wide distribution over  $1 < \gamma < 1.5$  and  $0.4 <$   
498  $\gamma < 1.0$ , respectively, when  $D < 2$  mm, but the variability in median values was relatively low. The  
499 relationships of  $\gamma$  for each particle shape type could be expressed by constant values at  $\gamma = 0.75$  (OH),  
500 0.88 (PH), 1.15 (OV), and 1.24 (PV), respectively, and these differences are around  $\gamma = 0.12$ . Maki et  
501 al. (2014) analyzed dual-pol radar variables and found that  $Z_{DR}$  increased with time; the dominant  
502 values at 10 and 18 min after the eruption were close to 1 and 2 dB, respectively. With respect to  
503 hydrometeors, the dominant  $\gamma$  of volcanic ash can be inferred from the relationship between  $\gamma$  and  $Z_{DR}$ ,  
504 as suggested by Herzegh and Jameson (1992). The values correspond to the  $\gamma$  of volcanic ash when the  
505 median  $\gamma$  of rain and ice is 0.85 and 0.73, respectively; this assumption is based on the  $|K|^2$  for  
506 volcanic ash being between that of ice and liquid water. These representative values correspond to D

507 of 1 and 0.15 mm, respectively, based on Eq. 9. It is implied that the amount of particles was largest  
508 when  $D < 1$  mm (95.8%) and the  $\gamma$  corresponded well to the observed  $Z_{DR}$ .

509

510

#### 511 **e. Canting angle**

512 Statistical analysis of  $\beta$  is required to understand the aerodynamic properties of volcanic ash  
513 particles, and the input parameters of T-matrix scattering simulations, to verify the observed radar  
514 variables. A histogram was used to analyze the distribution and dominant characteristics of  $\beta_R$ . The  
515 interval of the histogram was set to  $4^\circ$ .

516 More than 95% of  $\beta$  values for each particle shape type were concentrated in the range  $|\beta_R| \leq 30^\circ$ ,  
517 with  $0^\circ$  as the center (Fig. 13). The particles were symmetrically distributed around  $0^\circ$  and more than  
518 50% were concentrated in the range  $|\beta_R| < 4^\circ$ . The horizontally oriented  $\beta$  distribution was relatively  
519 narrow ( $|\beta_R| < 20^\circ$ ) and exhibited a unimodal distribution. It is noteworthy that 90% of OH particles  
520 were concentrated in the range  $|\beta_R| < 4^\circ$ . The vertically oriented  $\beta$  distribution was relatively broader  
521 ( $|\beta_R| < 30^\circ$ ) and followed a bimodal distribution. PV exhibited a bimodal form, but this was not  
522 symmetrical about  $0^\circ$ . For spheres, the  $\beta$  distribution was narrower, similar to horizontally oriented  
523 particles, and its had a bimodal distribution, similar to vertically oriented particles, indicating that the  
524 independent features of both orientations were combined.

525 The values of  $|\overline{\beta_R}|$  and  $|\sigma_\beta|$  for OH and PV (OV, PH) were  $0^\circ$  and  $3.5^\circ$  ( $0.4^\circ$ ,  $13.1^\circ$ ), and  $1.3^\circ$  and  
526  $12.7^\circ$  ( $0.2^\circ$ ,  $10.9^\circ$ ), respectively. OV (OH) had the highest (lowest) value of  $|\sigma_\beta|$ . Thus,  $|\overline{\beta_R}|$  and  $|\sigma_\beta|$  for  
527 the all volcanic ash particles were quite similar ( $0.3^\circ$  and  $10.1^\circ$ , respectively) to those of raindrops and  
528 the value of  $|\sigma_\beta|$  for Sp ( $11.5^\circ$ ) was higher than that of the entire data set ( $10.1^\circ$ ).

529 In the case OH, the  $|\sigma_\beta|$  value was about half that for raindrops while the values for OV, PH, and  
530 PV particles were all similar to that of raindrops. This validates the assumption of Marzano et al. (2012)



531 under stable conditions ( $|\sigma_\beta| = 10^\circ$ ). Therefore, we assumed that the tumbling phenomenon ( $|\sigma_\beta| > 30^\circ$ )  
532 of the particles under calm atmospheric conditions was likely to be minor.

533 To analyze the correlation between particle D and  $\beta$ , quartiles for each particle D interval were  
534 calculated (Fig. 14). The particles were concentrated at  $|\beta_R| < 30^\circ$  regardless of D, and median values  
535 were stable when  $D < 1$  mm for the entire particle shape types; however, fluctuation increased with D  
536 (Fig. 14a). The  $|\sigma_\beta|$  values gradually increased from  $10^\circ$  to  $13^\circ$  when  $0.3 < D < 1.3$  mm and variability  
537 was greatest around the center ( $13^\circ$ ). This increase in  $|\sigma_\beta|$  would not be expected in the case of a  
538 relatively small number of particles (Fig. 8a), since their standard deviation is largely maintained at  
539 about  $13^\circ$  regardless of dataset size.

540 Variability in the median values for individual particles was more apparent. The values converged  
541 around  $0^\circ$  but fluctuation increased with greater D from the zero line. The median  $|\beta_R|$  values  
542 exceeded  $3^\circ$ ,  $5^\circ$ ,  $10^\circ$ , and  $15^\circ$  when  $D > 1$  mm,  $1 < D < 2$  mm,  $2 < D < 3$  mm, and  $D > 3$  mm,  
543 respectively (Fig. 14b).

544

545

#### 546 **e. Verification**

547 To verify the basic parameters of volcanic ash estimated in the present study, the  $V_{T, \text{Ref}}$  (Eq. 2) was  
548 compared to the observed values ( $V_T$ ) obtained in the free-fall experiments (Fig. 15). The particle  
549 density (Fig. 10) and  $\gamma$  (Fig. 12) estimated in the present study were applied to the  $C_D$  (Eq. 3) and the  
550 sphericity (Eqs. 5–7) relationships; these parameters were used as input values for  $V_{T, \text{Ref}}$ . The  
551 atmospheric conditions were the same as in Fig. 5.

552 There was wide range of  $V_T$  over  $0.25 < D < 1.2$  mm for the entire particle shape types, and  $V_T$   
553 decreased when  $D > 1.2$  mm. The  $V_T$  in the present study corresponds to that obtained by Miwa et al  
554 (2015), who analyzed Parsivel data using the same laboratory experiments (Fig. 5); correspondence

555 was also good with other previous results (Beckett et al., 2015). A polynomial regression analysis was  
556 used to explore the nonlinear relationship between  $V_T$  and  $D$  (Table 3). The inflection point of  $V_T$  at  
557  $0.7 < D < 1.3$  mm results from an increase in the number of OH when  $D < 1$  mm (Fig. 8).

558 The  $V_{T,Ref}$  was lower (higher) than the observed value when  $D < 1.2$  mm ( $D > 2.4$  mm). One of the  
559 reasons why a difference between the theoretical and observed values appeared when  $D > 2.4$  mm was  
560 that the upper limit of  $D$  when 90% of the terminal velocity was reached was set at 4 mm for a height  
561 of 17 m (Fig. A1). This is nonetheless meaningful because the values of  $V_{T,Ref}$  calculated based on the  
562 basic parameters in this study were within  $\pm 5\%$  of the observed value.

563

#### 564 **4. Summary and Conclusions**

565 To inform the development of QAE methods, basic parameters ( $V_T$ ,  $\gamma$  and  $\beta$ ) of volcanic ash  
566 particles were analyzed using 2DVD. Data were collected according to 18 automatic volcanic ash  
567 weight measurements performed on Sakurajima volcano, Japan (31.58° N, 130.65° E). To identify the  
568 aerodynamic properties of the volcanic ash particles in the samples, a free-fall experiment using 2DVD  
569 was conducted with the large-scale rainfall simulator of the NIED, and 274,215 raw data points were  
570 obtained.

571 Radar variables are highly dependent on the  $|K|^2$ , size, and shape of particles. Particle types with  
572 rotating symmetric axes were selected, because volcanic ash particles have a wide variety of irregular  
573 shapes. Their orientation was also considered, and horizontally (OH) and vertically (OV) oriented  
574 oblate spheroids were therefore studied, as well as horizontally (PH) and vertically (PV) oriented  
575 prolate spheroids, and spheres (Sp).

576 The particle shape types were defined according to their  $\gamma_T$ , with a 10% bias range; the  $\beta$  among  
577 two values was selected to be representative when the value of  $\gamma_T$  was smaller (larger) than that of the  
578 other observation direction in the case of the oblate (prolate) particle.

579 The dominant particle shape comprised horizontally and vertical oriented particles, present in  
580 proportions of 75.51% and 21.60%, respectively. Regarding particle shape, oblate (prolate) spheroids  
581 comprised 76.26% (23.85%) of all particles in the samples. The most common particle shape type was  
582 OH, accounting for 59% of all particles when  $D < 1$  mm, and 69% when  $D < 0.5$  mm. Overall, 95.80%,  
583 93.87%, and 93.63% of the OH, OV, and PH particles had  $D < 1$  mm, respectively.

584 The  $V_T$  of the particles were in the order of prolate, sphere, and oblate, and vertical oriented  
585 particles had higher  $V_T$  than horizontal orientated particles. These results are consistent with the  $V_T$ ,  
586  $V_{T, Ref}$ , which suggests that 2DVD is a reliable for observing volcanic ash particles and the tumbling  
587 phenomenon under stable weather conditions. A noticeable increase in  $V_T$  for OH in the range  $0.5 < D$

588 < 1 mm occurred through an increase in  $\gamma$  and a decrease in the number of OH when  $D \sim 0.7$  mm; this  
589 was not observed for other particle types.

590 The estimated  $\rho_s$  converged to  $2.37 \text{ g cm}^{-3}$  when  $D > 1.5$  mm, and the median value changed over  
591 the range  $0.5 < D < 1.5$  mm. This is consistent with the particle density value for the Sakurajima  
592 volcano reported by Oguchi et al. (2009). The distributions of  $C_D$  and  $Re$  were divided into two particle  
593 type categories, OH and other, and  $C_D$  increased dramatically when  $Re < 70$ . These results were derived  
594 from the particle concentration of OH, which was highest when  $D < 0.5$  mm; at this threshold,  $C_D$  was  
595 higher and  $Re$  was lower. The range of  $V_T$  over  $0.7 < D < 1.3$  mm was informed by both  $\gamma$  and particle  
596 density.

597 The  $\sigma_\gamma$  decreased when  $D > 0.75$  mm, to 0.15, and converged to  $\gamma = 0.94$ . This is in contrast to the  
598 results obtained for raindrops, but is highly consistent with results for actual eruptions. Most measured  
599 values of  $Z_{DR}$  for Sakurajima volcanic ash clouds on August 18, 2013 were in the range 1–2 dB,  
600 corresponding to a horizontally oriented oblate spheroid.

601 The  $|\sigma_\beta|$  of OV particles with  $|\beta_0| = 90^\circ$  was largest ( $13.1^\circ$ ) among all particle types. OH particles  
602 had the lowest  $|\sigma_\beta|$  at  $3.5^\circ$ , and this value was also smaller than that of raindrops ( $7^\circ$ – $10^\circ$ ). Based on the  
603  $|\sigma_\beta|$  results, the tumbling phenomenon would not be dominant under calm atmospheric conditions. The  
604 quartiles were stable when  $D < 1$  mm for the entire particle shape types, but increased with  $D$ . The  
605 value of  $\sigma_\beta$  was higher when  $D < 1.3$  mm and started to converge around  $13^\circ$  due to a decrease in the  
606 number of OH particles.

607 The estimated  $\gamma$  and  $\rho_s$  were applied to the  $V_{T,Ref}$  for validation. The observed  $V_T$  was within  $\pm 5\%$   
608 of the theoretical value when  $D \leq 4$  mm, implying that the estimates of the basic parameters were  
609 reasonable for the particle range considered.

610 These results could inform the development of new approaches for detecting non-hydrometeors  
611 using weather radar, thus facilitating observations of ash clouds and preventing the damage to human  
612 life and property caused by large amounts of ash fall. In future work we will analyze the eruption of  
613 Sakurajima volcano that occurred on August 18, 2013 with a dual-pol radar and 2DVD, using basic  
614 parameters of volcanic ash particles obtained from laboratory experiments. Differences in  
615 characteristics between the experimental, and actual basic parameters, and PSD, will be investigated.

616

617        **Acknowledgments**

618        This work was supported by a Grant-in Aid for JSPS KAKENHI (grant number JP16H03145) and  
619        partially supported by a DPRI collaborative research grant (Kyoto Univ. 25G-11). The authors  
620        acknowledge the provision of ashfall data and funding for this work from Kyoto and Kagoshima  
621        Universities. The 2DVD data were provided by MEXT, Japan. We also thank the NIED for use of  
622        their large-rainfall simulator.

623

624 **Appendix A**

625

626 The theoretical fall velocity and falling distance with time are calculated as follows;

627

628

$$F = ma = F_g - F_D$$

629

Eq. (A1)

630

$$F_g = mg$$

631

Eq. (A2)

632

$$F_D = \frac{1}{2} \rho_g V^2 C_D A$$

633

Eq. (A3)

634

635 where  $F_g$  is universal gravitation,  $F_D$  is drag force,  $m$  is mass, and  $a$  is the free-fall acceleration.

636 In Eq. A2,  $g$  is the acceleration due to gravity, considered to be  $9.81 \text{ m s}^{-2}$ , and  $V$  and  $C_D$  in Eq. A3

637 correspond to the values in Eq. 2–7. The symbols  $\mu$  and  $\rho_g$  are the dynamic viscosity and density of

638 the atmosphere and were assumed as  $1.837 \times 10^{-5} \text{ kg m}^{-1} \text{ s}^{-1}$  and  $1.194 \times 10^{-5} \text{ g cm}^{-3}$ , respectively.

639 The results were based on conditions at an atmospheric  $T$  as  $25 \text{ }^\circ\text{C}$ .

640 To ensure accuracy, we considered the surface roughness effect of a volcanic ash particle ( $1.07^{-1}$ )

641 on the fall velocity, as suggested by Bagheri and Bonadonna (2016), and the results for  $D = 4 \text{ mm}$

642 are shown in Fig. A1.

643 **References**

644

645 Adams, R. J., Perger, W. F., Rose, W. I., and Kostinski, A.: Measurements of the complex dielectric  
646 constant of volcanic ash from 4 to 19 GHz, *Journal of Geophysical Research: Solid Earth*,  
647 101, 8175-8185, 1996.

648 Alfano, F., Bonadonna, C., Delmelle, P., and Costantini, L.: Insights on tephra settling velocity from  
649 morphological observations, *Journal of Volcanology and Geothermal Research*, 208, 86-  
650 98, 2011.

651 Andsager, K., Beard, K. V., and Laird, N. F.: Laboratory measurements of axis ratios for large  
652 raindrops, *Journal of the Atmospheric Sciences*, 56, 2673-2683, 1999.

653 Atlas, D., Srivastava, R., and Sekhon, R. S.: Doppler radar characteristics of precipitation at vertical  
654 incidence, *Reviews of Geophysics*, 11, 1-35, 1973.

655 Böhm, H. P.: A general equation for the terminal fall speed of solid hydrometeors, *Journal of the*  
656 *Atmospheric Sciences*, 46, 2419-2427, 1989.

657 Bagheri, G. and Bonadonna, C.: On the drag of freely falling non-spherical particles, *Powder*  
658 *Technology*, 301, 526-544, 2016.

659 Bagheri, G., Bonadonna, C., Manzella, I., Pontelandolfo, P., and Haas, P.: Dedicated vertical wind  
660 tunnel for the study of sedimentation of non-spherical particles, *Review of Scientific*  
661 *Instruments*, 84, 054501, 2013.

662 Beard, K. V. and Chuang, C.: A new model for the equilibrium shape of raindrops, *Journal of the*  
663 *Atmospheric sciences*, 44, 1509-1524, 1987.



- 664 Beckett, F., Witham, C., Hort, M., Stevenson, J., Bonadonna, C., and Millington, S.: Sensitivity of  
665 dispersion model forecasts of volcanic ash clouds to the physical characteristics of the  
666 particles, *Journal of Geophysical Research: Atmospheres*, 120, 2015.
- 667 Bonadonna, C., Cioni, R., Pistolesi, M., Elissondo, M., and Baumann, V.: Sedimentation of long-  
668 lasting wind-affected volcanic plumes: the example of the 2011 rhyolitic Cordón Caulle  
669 eruption, Chile, *Bulletin of Volcanology*, 77, 13, 2015.
- 670 Bonadonna, C., Ernst, G., and Sparks, R.: Thickness variations and volume estimates of tephra fall  
671 deposits: the importance of particle Reynolds number, *Journal of Volcanology and  
672 Geothermal Research*, 81, 173-187, 1998.
- 673 Bonadonna, C., Folch, A., Loughlin, S., and Puempel, H.: Future developments in modelling and  
674 monitoring of volcanic ash clouds: outcomes from the first IAVCEI-WMO workshop on  
675 Ash Dispersal Forecast and Civil Aviation, *Bulletin of volcanology*, 74, 1-10, 2012.
- 676 Bonadonna, C., Genco, R., Gouhier, M., Pistolesi, M., Cioni, R., Alfano, F., Hoskuldsson, A., and  
677 Ripepe, M.: Tephra sedimentation during the 2010 Eyjafjallajökull eruption (Iceland)  
678 from deposit, radar, and satellite observations, *Journal of Geophysical Research: Solid  
679 Earth (1978–2012)*, 116, 2011.
- 680 Brandes, E. A., Ikeda, K., Zhang, G., Schönhuber, M., and Rasmussen, R. M.: A statistical and physical  
681 description of hydrometeor distributions in Colorado snowstorms using a video  
682 disdrometer, *Journal of applied meteorology and climatology*, 46, 634-650, 2007.
- 683 Clift, R. and Gauvin, W.: Motion of particles in turbulent gas streams, *British Chemical Engineering*,  
684 16, 229-&, 1971.

685 Coltelli, M., Miraglia, L., and Scollo, S.: Characterization of shape and terminal velocity of tephra  
686 particles erupted during the 2002 eruption of Etna volcano, Italy, *Bulletin of volcanology*,  
687 70, 1103-1112, 2008.

688 Del Bello, E., Taddeucci, J., Vitturi, M. d. M., Scarlato, P., Andronico, D., Scollo, S., Kueppers, U.,  
689 and Ricci, T.: Effect of particle volume fraction on the settling velocity of volcanic ash  
690 particles: insights from joint experimental and numerical simulations, *Scientific reports*,  
691 7, 39620, 2017.

692 Dellino, P., Gudmundsson, M., Larsen, G., Mele, D., Stevenson, J., Thordarson, T., and Zimanowski,  
693 B.: Ash from the Eyjafjallajökull eruption (Iceland): Fragmentation processes and  
694 aerodynamic behavior, *Journal of Geophysical Research: Solid Earth*, 117, 2012.

695 Dellino, P., Mele, D., Bonasia, R., Braia, G., La Volpe, L., and Sulpizio, R.: The analysis of the  
696 influence of pumice shape on its terminal velocity, *Geophysical Research Letters*, 32,  
697 2005.

698 Dioguardi, F., Mele, D., and Dellino, P.: A New One-Equation Model of Fluid Drag for Irregularly  
699 Shaped Particles Valid Over a Wide Range of Reynolds Number, *Journal of Geophysical*  
700 *Research: Solid Earth*, 123, 144-156, 2018.

701 Dioguardi, F., Mele, D., Dellino, P., and Dürig, T.: The terminal velocity of volcanic particles with  
702 shape obtained from 3D X-ray microtomography, *Journal of Volcanology and Geothermal*  
703 *Research*, 329, 41-53, 2017.

704 Donnadieu, F.: *Volcanological applications of Doppler radars: A review and examples from a*  
705 *transportable pulse radar in L-band*, INTECH Open Access Publisher, 2012.

706 Folch, A.: A review of tephra transport and dispersal models: evolution, current status, and future  
707 perspectives, *Journal of Volcanology and Geothermal Research*, 235, 96-115, 2012.

708 Folch, A., Costa, A., and Macedonio, G.: FALL3D: A computational model for transport and  
709 deposition of volcanic ash, *Computers & Geosciences*, 35, 1334-1342, 2009.

710 Ganser, G. H.: A rational approach to drag prediction of spherical and nonspherical particles, *Powder*  
711 *Technology*, 77, 143-152, 1993.

712 Garboczi, E. and Bullard, J.: 3D analytical mathematical models of random star-shape particles via a  
713 combination of X-ray computed microtomography and spherical harmonic analysis,  
714 *Advanced Powder Technology*, 28, 325-339, 2017.

715 Garrett, T. J., Yuter, S. E., Fallgatter, C., Shkurko, K., Rhodes, S. R., and Endries, J. L.: Orientations  
716 and aspect ratios of falling snow, *Geophysical Research Letters*, 42, 4617-4622, 2015.

717 Goddard, C. and Wierzbicka, A.: *Semantic and lexical universals: Theory and empirical findings*, John  
718 Benjamins Publishing, 1994.

719 Hölzer, A. and Sommerfeld, M.: New simple correlation formula for the drag coefficient of non-  
720 spherical particles, *Powder Technology*, 184, 361-365, 2008.

721 Haider, A. and Levenspiel, O.: Drag coefficient and terminal velocity of spherical and nonspherical  
722 particles, *Powder technology*, 58, 63-70, 1989.

723 Happel, J. and Brenner, H.: *Low Reynolds number hydrodynamics: with special applications to*  
724 *particulate media*, Springer Science & Business Media, 2012.

725 Harris, D. M. and Rose, W. I.: Estimating particle sizes, concentrations, and total mass of ash in  
726 volcanic clouds using weather radar, *Journal of Geophysical Research: Oceans* (1978–  
727 2012), 88, 10969-10983, 1983.

728 Hendry, A., Antar, Y., and McCormick, G.: On the relationship between the degree of preferred  
729 orientation in precipitation and dual-polarization radar echo characteristics, *Radio science*,  
730 22, 37-50, 1987.

731 Herzegh, P. H. and Jameson, A. R.: Observing precipitation through dual-polarization radar  
732 measurements, *Bulletin of the American Meteorological Society*, 73, 1365-1376, 1992.

733 Hillman, S. E., Horwell, C. J., Densmore, A. L., Damby, D. E., Fubini, B., Ishimine, Y., and Tomatis,  
734 M.: Sakurajima volcano: a physico-chemical study of the health consequences of long-  
735 term exposure to volcanic ash, *Bulletin of volcanology*, 74, 913-930, 2012.

736 Huang, G.-J., Bringi, V., Cifelli, R., Hudak, D., and Petersen, W.: A methodology to derive radar  
737 reflectivity-liquid equivalent snow rate relations using C-band radar and a 2D video  
738 disdrometer, *Journal of Atmospheric and Oceanic Technology*, 27, 637-651, 2010.

739 Huang, G.-J., Bringi, V., Moisseev, D., Petersen, W. A., Bliven, L., and Hudak, D.: Use of 2D-video  
740 disdrometer to derive mean density–size and Z e–SR relations: Four snow cases from the  
741 light precipitation validation experiment, *Atmospheric Research*, 153, 34-48, 2015.

742 Huang, G.-J., Bringi, V., and Thurai, M.: Orientation angle distributions of drops after an 80-m fall  
743 using a 2D video disdrometer, *Journal of Atmospheric and Oceanic Technology*, 25, 1717-  
744 1723, 2008.

745 Jaffrain, J., Studzinski, A., and Berne, A.: A network of disdrometers to quantify the small-scale  
746 variability of the raindrop size distribution, *Water Resources Research*, 47, 2011.

747 Jewell, R. and Brimelow, J.: Evaluation of Alberta hail growth model using severe hail proximity  
748 soundings from the United States, *Weather and Forecasting*, 24, 1592-1609, 2009.

- 749 Jung, Y., Zhang, G., and Xue, M.: Assimilation of simulated polarimetric radar data for a convective  
750 storm using the ensemble Kalman filter. Part I: Observation operators for reflectivity and  
751 polarimetric variables, *Monthly Weather Review*, 136, 2228-2245, 2008.
- 752 Kanofsky, L. M.: A comparative study of drop size distribution retrieval using two video disdrometers  
753 and a UHF wind profiling radar, 2005.
- 754 Kim, D. K. and Lee, D. I.: Raindrop size distribution properties associated with vertical air motion in  
755 the stratiform region of a springtime rain event from 1290 MHz wind profiler, micro rain  
756 radar and Parsivel disdrometer measurements, *Meteorological Applications*, 23, 40-49,  
757 2016.
- 758 Kruger, A. and Krajewski, W. F.: Two-dimensional video disdrometer: A description, *Journal of*  
759 *Atmospheric and Oceanic Technology*, 19, 602-617, 2002.
- 760 Kunii, D.: 0. Levenspiel, *Fluidization Engineering*, John Wiley, 8, 44-45, 1969.
- 761 Langmann, B., Folch, A., Hensch, M., and Matthias, V.: Volcanic ash over Europe during the eruption  
762 of Eyjafjallajökull on Iceland, April–May 2010, *Atmospheric Environment*, 48, 1-8, 2012.
- 763 Maki, M. and Doviak, R.: Volcanic ash size distribution determined by weather radar, 2001, 1810-  
764 1811.
- 765 Maki, M., Iguchi, M., Maesaka, T., Miwa, T., Tanada, T., Kozono, T., Momotani, T., Yamaji, A., and  
766 Kakimoto, I.: Preliminary results of weather radar observations of sakurajima volcanic  
767 smoke, *Journal of Disaster Research*, 11, 15-30, 2016.
- 768 Maki, M., Maesaka, T., Kozono, T., Nagai, M., Furukawa, R., Nakada, S., Koshida, T., and Takenaka,  
769 H.: Quantitative volcanic ash estimation by operational polarimetric weather radar, 2012.

- 770 Maki, M., Maesaka, T., Muraji, Y., and Suzuki, I.: Statistical analysis of volcanic ash measured by X-  
771 band polarimetric radar, 2014.
- 772 Mandø, M. and Rosendahl, L.: On the motion of non-spherical particles at high Reynolds number,  
773 Powder Technology, 202, 1-13, 2010.
- 774 Marzano, F. S., Barbieri, S., Vulpiani, G., and Rose, W. I.: Volcanic ash cloud retrieval by ground-  
775 based microwave weather radar, IEEE transactions on geoscience and remote sensing, 44,  
776 3235-3246, 2006.
- 777 Marzano, F. S., Picciotti, E., Montopoli, M., and Vulpiani, G.: Inside volcanic clouds: Remote sensing  
778 of ash plumes using microwave weather radars, Bulletin of the American Meteorological  
779 Society, 94, 1567-1586, 2013.
- 780 Marzano, F. S., Picciotti, E., Vulpiani, G., and Montopoli, M.: Synthetic signatures of volcanic ash  
781 cloud particles from X-band dual-polarization radar, IEEE Transactions on Geoscience  
782 and Remote Sensing, 50, 193-211, 2012.
- 783 Matson, R. J. and Huggins, A. W.: The direct measurement of the sizes, shapes and kinematics of  
784 falling hailstones, Journal of the Atmospheric Sciences, 37, 1107-1125, 1980.
- 785 Nešpor, V., Krajewski, W. F., and Kruger, A.: Wind-induced error of raindrop size distribution  
786 measurement using a two-dimensional video disdrometer, Journal of Atmospheric and  
787 Oceanic Technology, 17, 1483-1492, 2000.
- 788 Miwa T., Maki M., Kozono T., Fujita E., Tanada T., and Iguchi M.: Experimental measurement on  
789 falling velocity of volcanic ash from Sakurajima volcano by using PARSIVEL  
790 disdrometer. Annual of Disas. Prev. Res. Inst., Kyoto Univ. 58(B), 91-94, 2015.

791 Oguchi, T., Udagawa, M., Nanba, N., Maki, M., and Ishimine, Y.: Measurements of dielectric constant  
792 of volcanic ash erupted from five volcanoes in Japan, *IEEE Transactions on Geoscience*  
793 *and Remote Sensing*, 47, 1089-1096, 2009.

794 Poulidis, A. P., Takemi, T., Iguchi, M., and Renfrew, I. A.: Orographic effects on the transport and  
795 deposition of volcanic ash: A case study of Mount Sakurajima, Japan, *Journal of*  
796 *Geophysical Research: Atmospheres*, 122, 9332-9350, 2017.

797 Pruppacher, H. R. and Beard, K.: A wind tunnel investigation of the internal circulation and shape of  
798 water drops falling at terminal velocity in air, *Quarterly Journal of the Royal*  
799 *Meteorological Society*, 96, 247-256, 1970.

800 Riley, C. M., Rose, W. I., and Bluth, G. J.: Quantitative shape measurements of distal volcanic ash,  
801 *Journal of Geophysical Research: Solid Earth*, 108, 2003.

802 Rong, L., Zhou, Z., and Yu, A.: Lattice–Boltzmann simulation of fluid flow through packed beds of  
803 uniform ellipsoids, *Powder Technology*, 285, 146-156, 2015.

804 Rosenfeld, D. and Ulbrich, C. W.: Cloud microphysical properties, processes, and rainfall estimation  
805 opportunities. In: *Radar and Atmospheric Science: A Collection of Essays in Honor of*  
806 *David Atlas*, Springer, 2003.

807 Ryzhkov, A., Pinsky, M., Pokrovsky, A., and Khain, A.: Polarimetric radar observation operator for a  
808 cloud model with spectral microphysics, *Journal of Applied Meteorology and*  
809 *Climatology*, 50, 873-894, 2011.

810 Sauvageot, H.: *Radar meteorology*, Artech House Publishers, 1992.

- 811 Seliga, T. A. and Bringi, V.: Potential use of radar differential reflectivity measurements at orthogonal  
812 polarizations for measuring precipitation, *Journal of Applied Meteorology*, 15, 69-76,  
813 1976.
- 814 Seligman, A. N., Bindeman, I. N., Watkins, J. M., and Ross, A. M.: Water in volcanic glass: From  
815 volcanic degassing to secondary hydration, *Geochimica et Cosmochimica Acta*, 191, 216-  
816 238, 2016.
- 817 Sigurdsson, H., Houghton, B., McNutt, S., Rymer, H., and Stix, J.: *The encyclopedia of volcanoes*,  
818 Elsevier, 2015.
- 819 Sparks, R., Bursik, M., Carey, S., Gilbert, J., Glaze, L., Sigurdsson, H., and Woods, A.: *Volcanic*  
820 *Plumes*, 574 pp. John Wiley, Chichester, UK, 1997.
- 821 Stevenson, J., Millington, S., Beckett, F., Swindles, G., and Thordarson, T.: Big grains go far:  
822 understanding the discrepancy between tephrochronology and satellite infrared  
823 measurements of volcanic ash, *Atmospheric Measurement Techniques*, 8, 2069-2091,  
824 2015.
- 825 Stokes, G. G.: *On the effect of the internal friction of fluids on the motion of pendulums*, Pitt Press  
826 Cambridge, 1851.
- 827 Suzuki, T.: A theoretical model for dispersion of tephra, *Arc volcanism: physics and tectonics*, 95, 113,  
828 1983.
- 829 Tajima, Y., Ohara, D., Fukuda, K., and Shimomura, S.: Development of Automatic Tephrometer for  
830 Monitoring of Volcano, 2015, 39-46.



831 Testud, J., Oury, S., Black, R. A., Amayenc, P., and Dou, X.: The concept of “normalized” distribution  
832 to describe raindrop spectra: A tool for cloud physics and cloud remote sensing, *Journal*  
833 *of Applied Meteorology*, 40, 1118-1140, 2001.

834 Thurai, M. and Bringi, V.: Drop axis ratios from a 2D video disdrometer, *Journal of Atmospheric and*  
835 *Oceanic Technology*, 22, 966-978, 2005.

836 Thurai, M., Huang, G., Bringi, V., Randeu, W., and Schönhuber, M.: Drop shapes, model comparisons,  
837 and calculations of polarimetric radar parameters in rain, *Journal of Atmospheric and*  
838 *Oceanic Technology*, 24, 1019-1032, 2007.

839 Tokay, A., Wolff, D. B., and Petersen, W. A.: Evaluation of the new version of the laser-optical  
840 disdrometer, OTT Parsivel2, *Journal of Atmospheric and Oceanic Technology*, 31, 1276-  
841 1288, 2014.

842 Tran-Cong, S., Gay, M., and Michaelides, E. E.: Drag coefficients of irregularly shaped particles,  
843 *Powder Technology*, 139, 21-32, 2004.

844 Ulbrich, C. W.: Natural variations in the analytical form of the raindrop size distribution, *Journal of*  
845 *Climate and Applied Meteorology*, 22, 1764-1775, 1983.

846 Van Eaton, A. R., Muirhead, J. D., Wilson, C. J., and Cimarelli, C.: Growth of volcanic ash aggregates  
847 in the presence of liquid water and ice: an experimental approach, *Bulletin of volcanology*,  
848 74, 1963-1984, 2012.

849 Waterman, P.: Matrix formulation of electromagnetic scattering, *Proceedings of the IEEE*, 53, 805-  
850 812, 1965.

851 Waterman, P. C.: Symmetry, unitarity, and geometry in electromagnetic scattering, *Physical review D*,  
852 3, 825, 1971.

- 853 Wilson, L. and Huang, T.: The influence of shape on the atmospheric settling velocity of volcanic ash  
854 particles, *Earth and Planetary Science Letters*, 44, 311-324, 1979.
- 855 Wilson, T. M., Jenkins, S., and Stewart, C.: Impacts from volcanic ash fall. In: *Volcanic Hazards,*  
856 *Risks and Disasters*, Elsevier, 2015.
- 857 Wilson, T. M., Stewart, C., Sword-Daniels, V., Leonard, G. S., Johnston, D. M., Cole, J. W., Wardman,  
858 J., Wilson, G., and Barnard, S. T.: Volcanic ash impacts on critical infrastructure, *Physics*  
859 *and Chemistry of the Earth, Parts A/B/C*, 45, 5-23, 2012.

860

861

# Figures

862

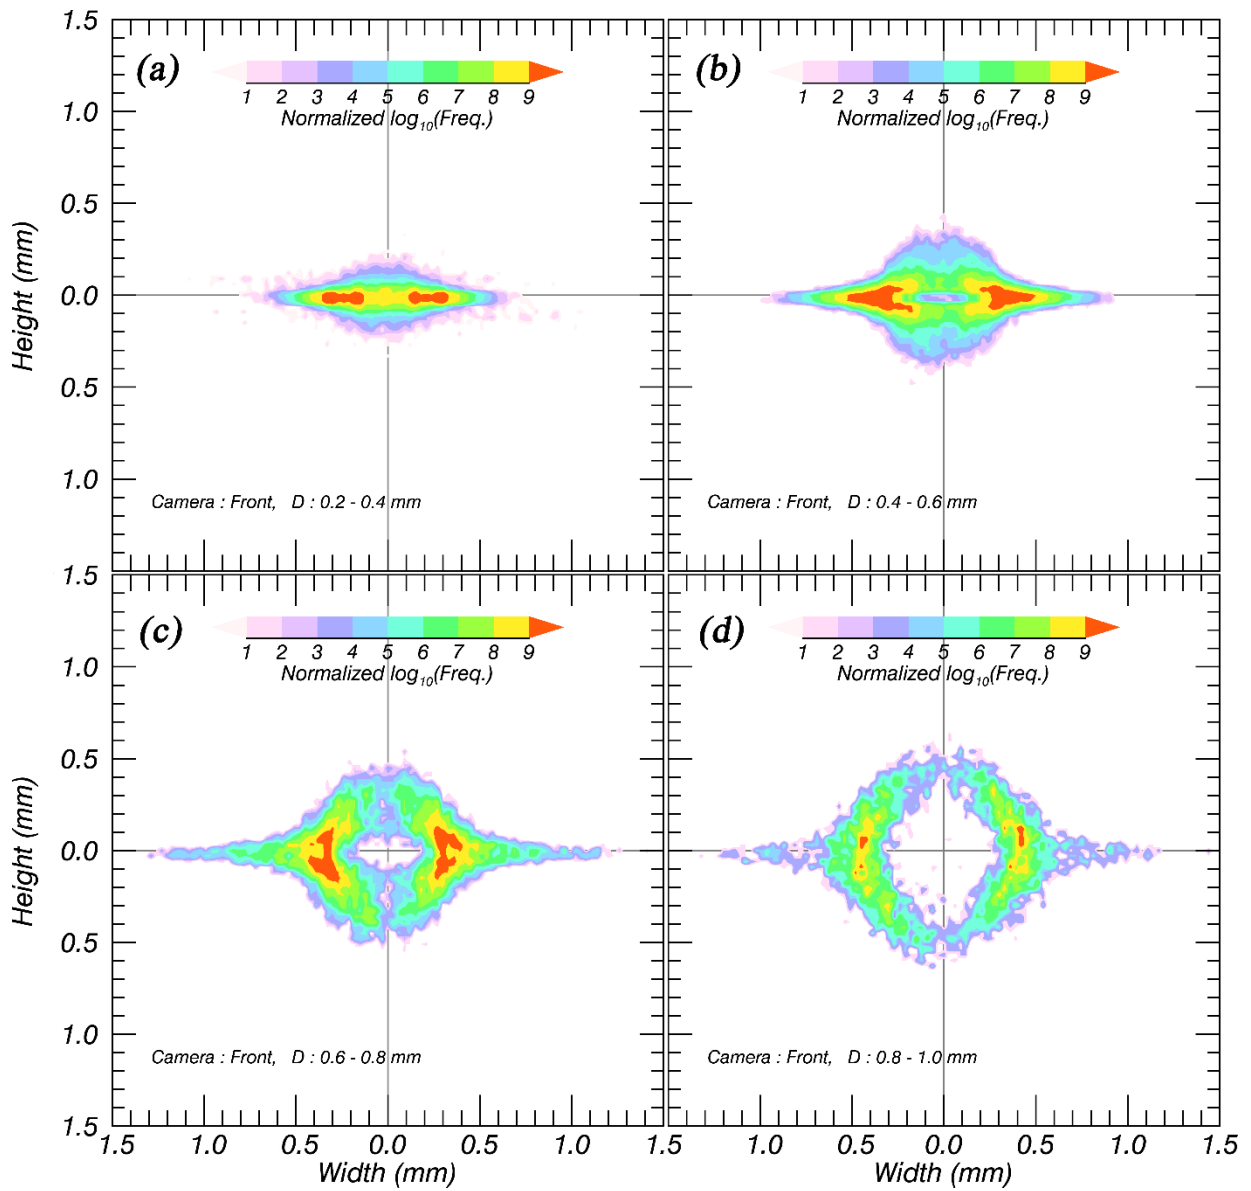

863

864 Figure 1. Accumulated contoured images of volcanic ash particles with D measured by a two-  
865 dimensional video disdrometer (2DVD).

866

867

868

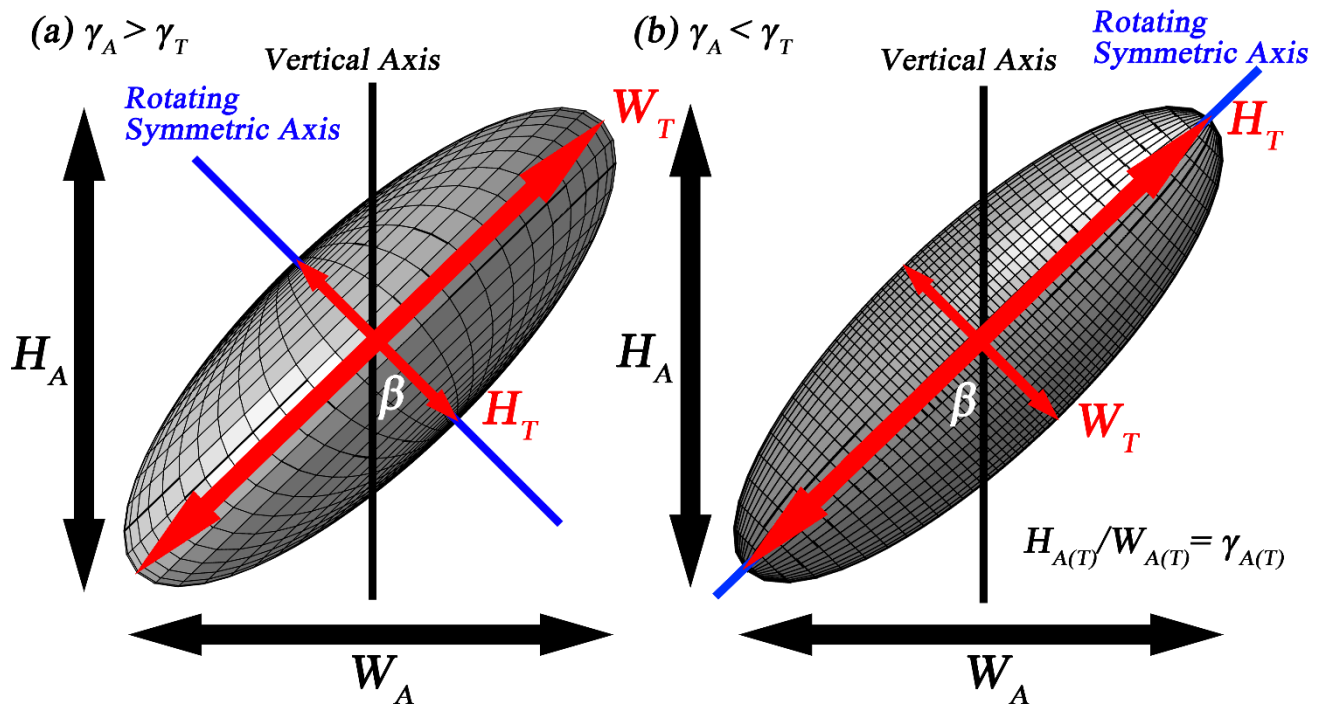

869

870 Figure 2. Conceptual model of an (a) oblate and (b) prolate spheroid with the same canting angle  
 871 ( $\beta$ ).  $W_{A(T)}$  and  $H_{A(T)}$  are the apparent (true) width and height of the particle, respectively.  $\gamma_{A(T)}$  is the  
 872 apparent (true) axis ratio.

873

874

875

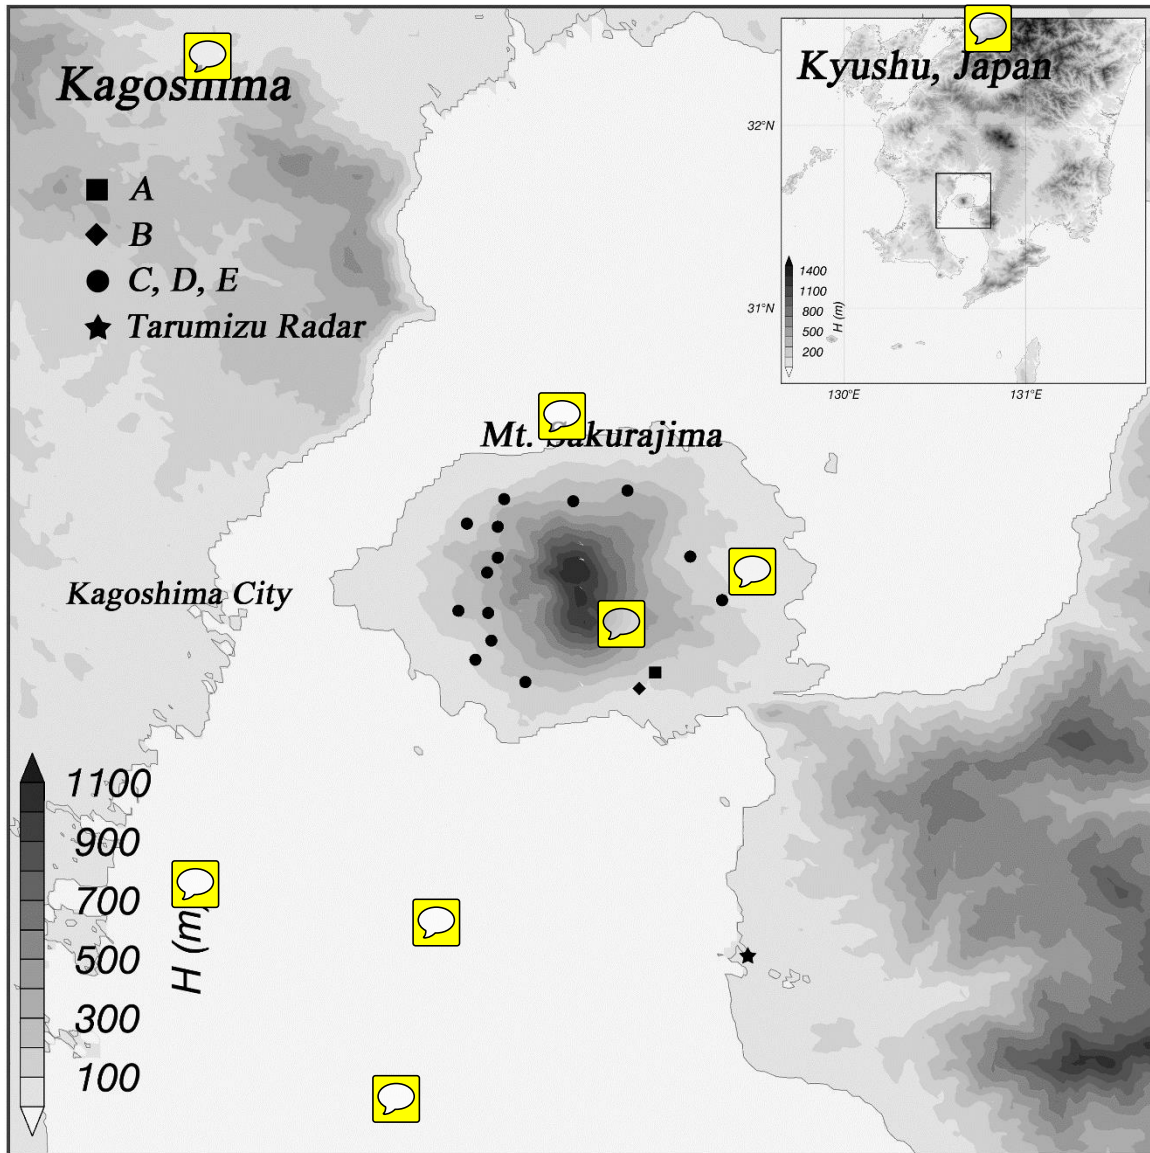

876

877

878

879

880

881

882

Figure 3. The locations of tephrometers and Showa crater on Sakurajima volcano, Japan. Black symbols indicate the locations of tephrometers and the star, square, and circle symbols correspond to datasets A, B and C–E, respectively. The white circle symbol represents the location of Showa crater.

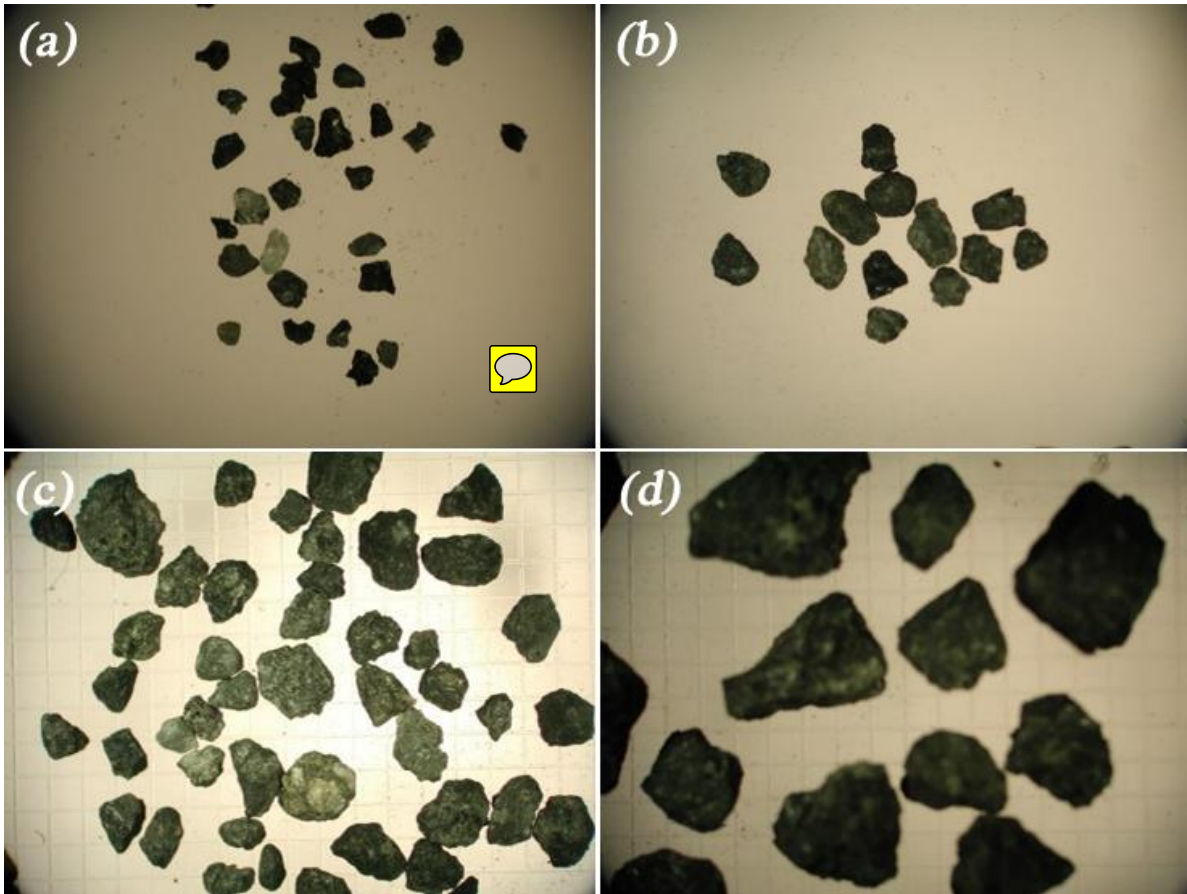

883

884

885

886

887

888

889

Figure 4. Real images of volcanic ash particles used in the present study. The particles were classified as (a)  $0.125 \text{ mm} < D \leq 0.25 \text{ mm}$ , (b)  $0.25 \text{ mm} < D \leq 1 \text{ mm}$ , (c)  $1 \text{ mm} < D < 2 \text{ mm}$ , and (d)  $2 < D \leq 4 \text{ mm}$ .

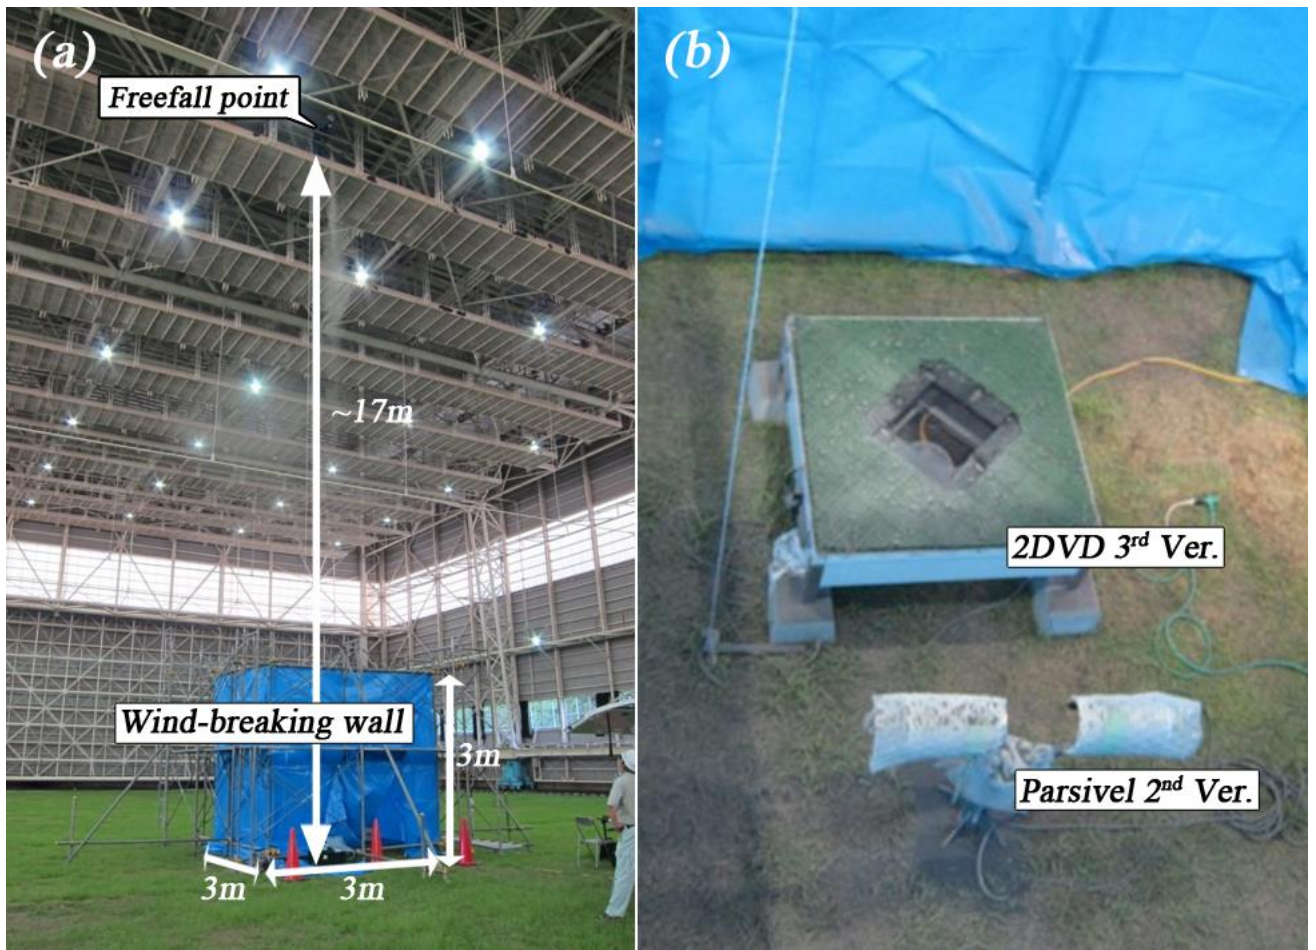

890

891

892

893

894

895

896

Figure 5. Free-fall experiment conditions of volcanic ash particles on the (a) outside and (b) inside of the wind-breaking wall covering the disdrometers in the large-scale rainfall simulator of the National Research Institute for Earth Science and Disaster Prevention (NIED).

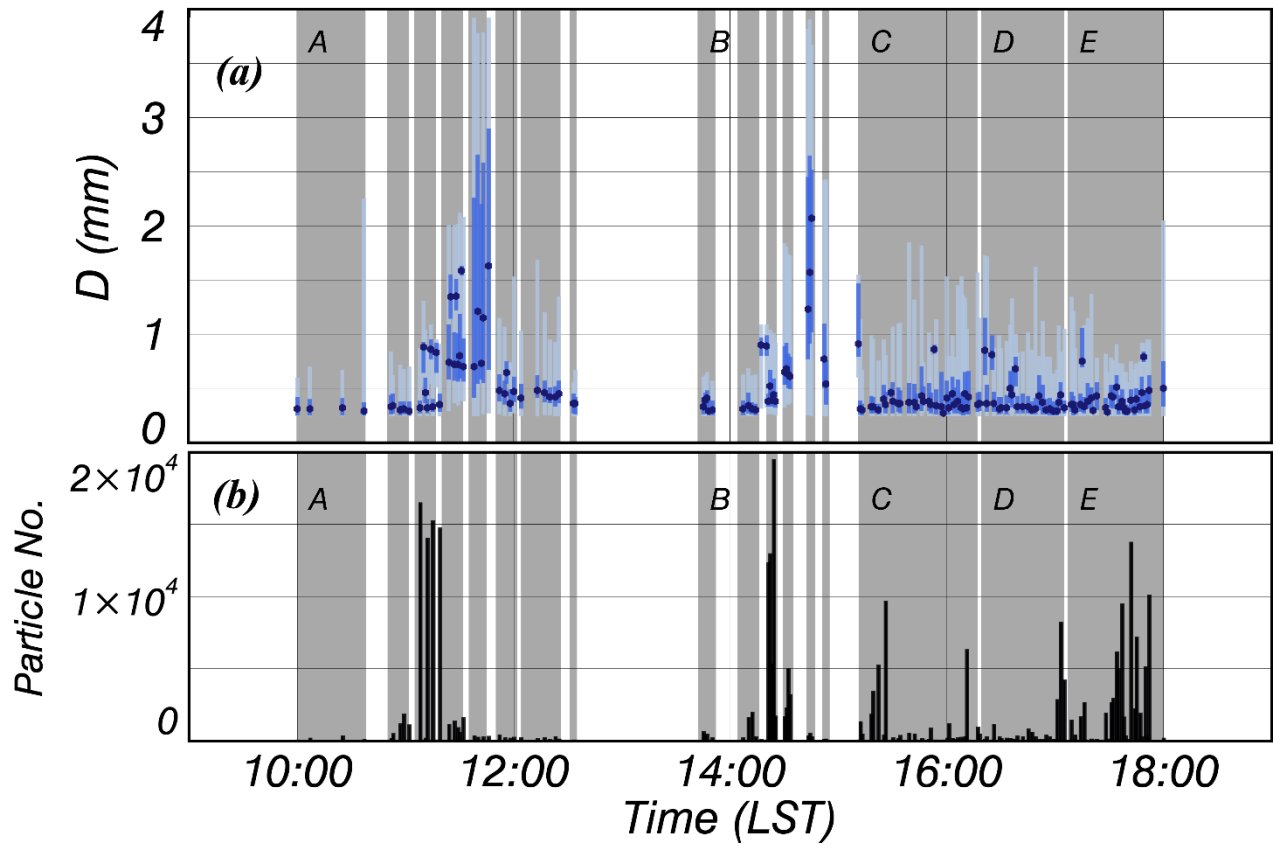

897

898 Figure 6. The 1-min interval time series of  $D$  and the number of particles in the free-fall

899 experiment conducted at the NIED.

900

901

902



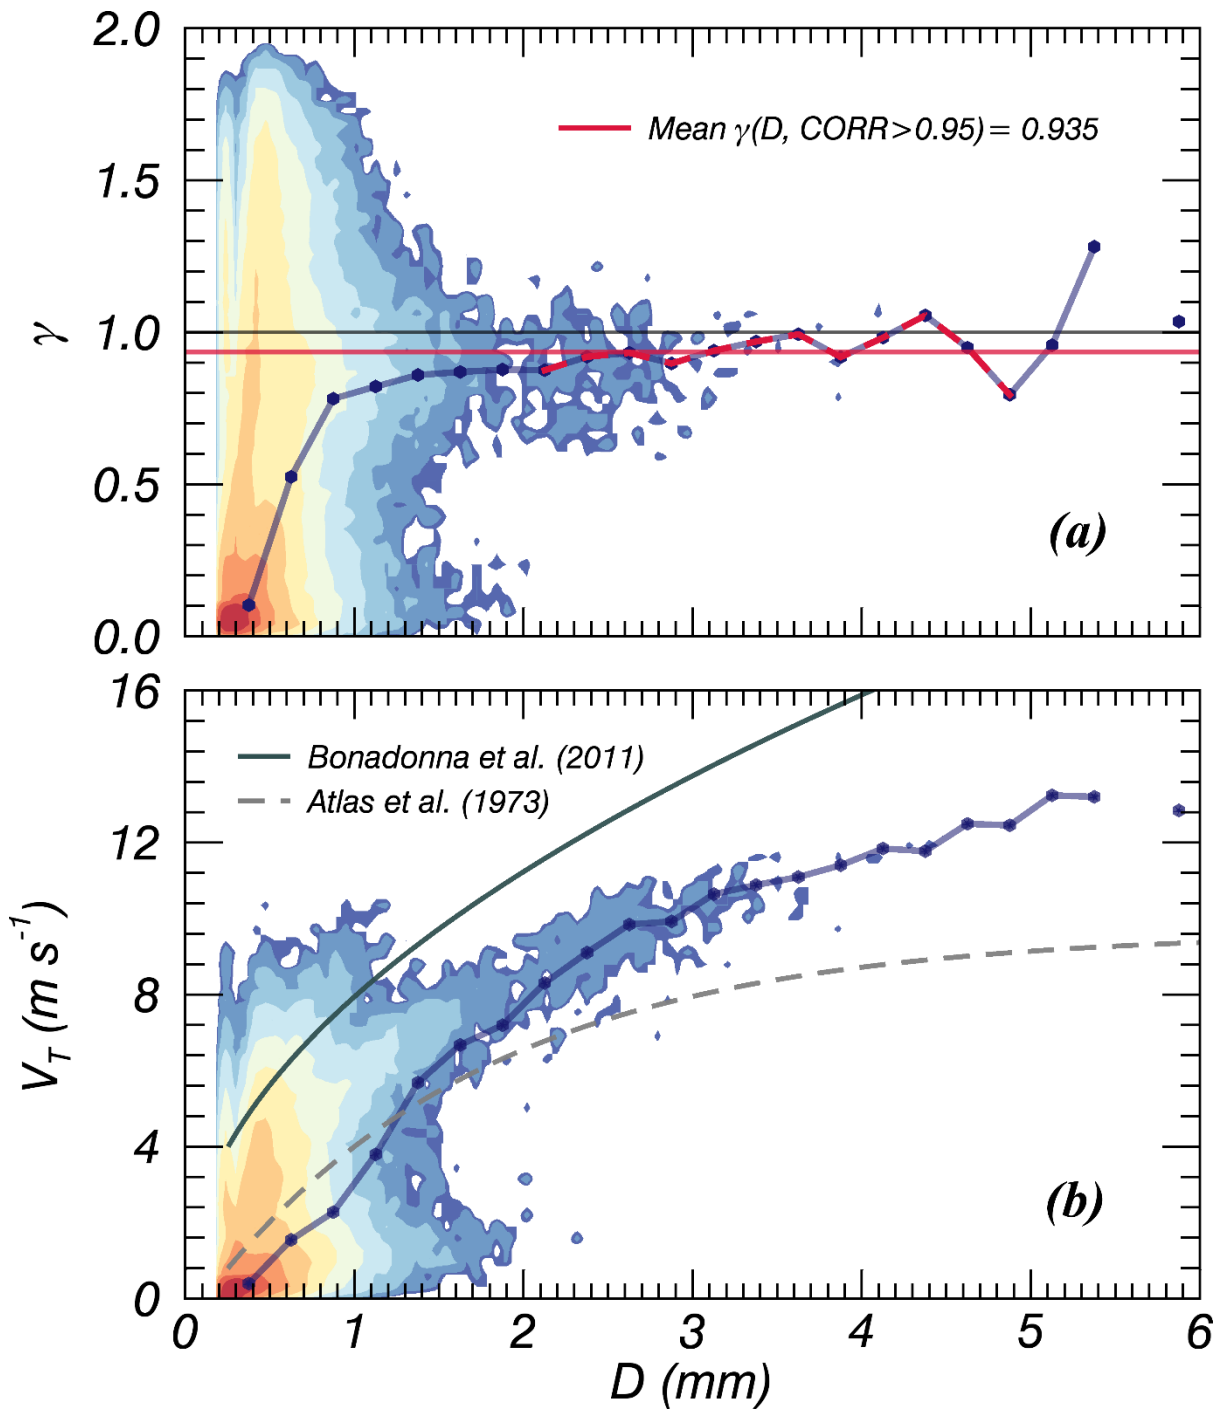

903

904 Figure 7. Contour image of volcanic ash particles for (a) the axis ratio ( $\gamma$ ) and (b) terminal velocity  
 905 ( $V_T$ ) with respect to the raw data. Grey solid and broken lines are the relationships between volcanic  
 906 ash particles and raindrops suggested by Bonadonna et al. (2011) and Atlas et al. (1971), respectively.  
 907 The red solid line is the averaged  $\gamma$  satisfying the condition that the correlation coefficient exceeds  
 908 0.95.

909

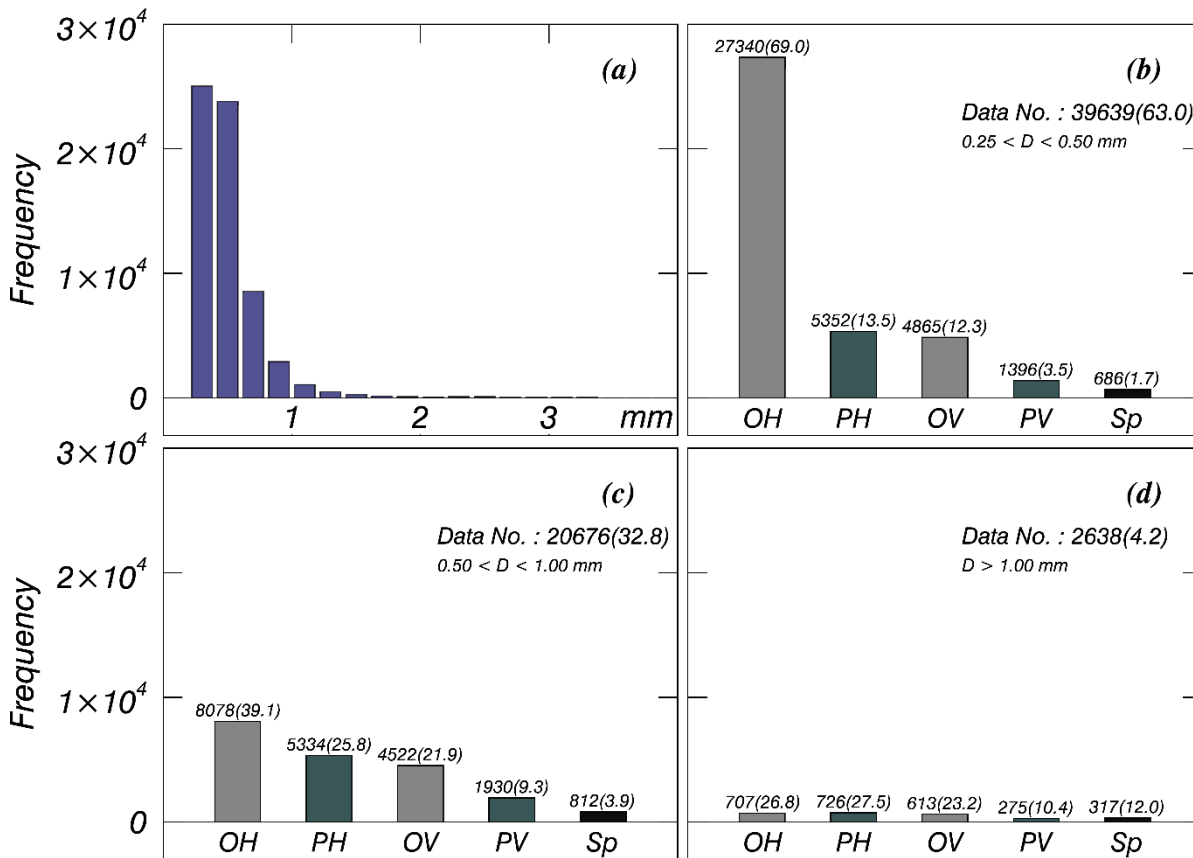

910

911 Figure 8. Histograms of volcanic ash particles for (a) all particle types and (b–d) each particle  
 912 shape type of the phi scale. The grey- and dark grey-shaded (patterned) bars indicate horizontal oblate  
 913 (OH) (vertical oblate [OV]) and horizontal prolate (PH) (vertical prolate [PV]), respectively. The black  
 914 bar corresponds to spherical (Sp) particles. The number on the top of each bar plot is the number of  
 915 data points and that in parenthesis is the percentage for each phi scale.

916

917

918

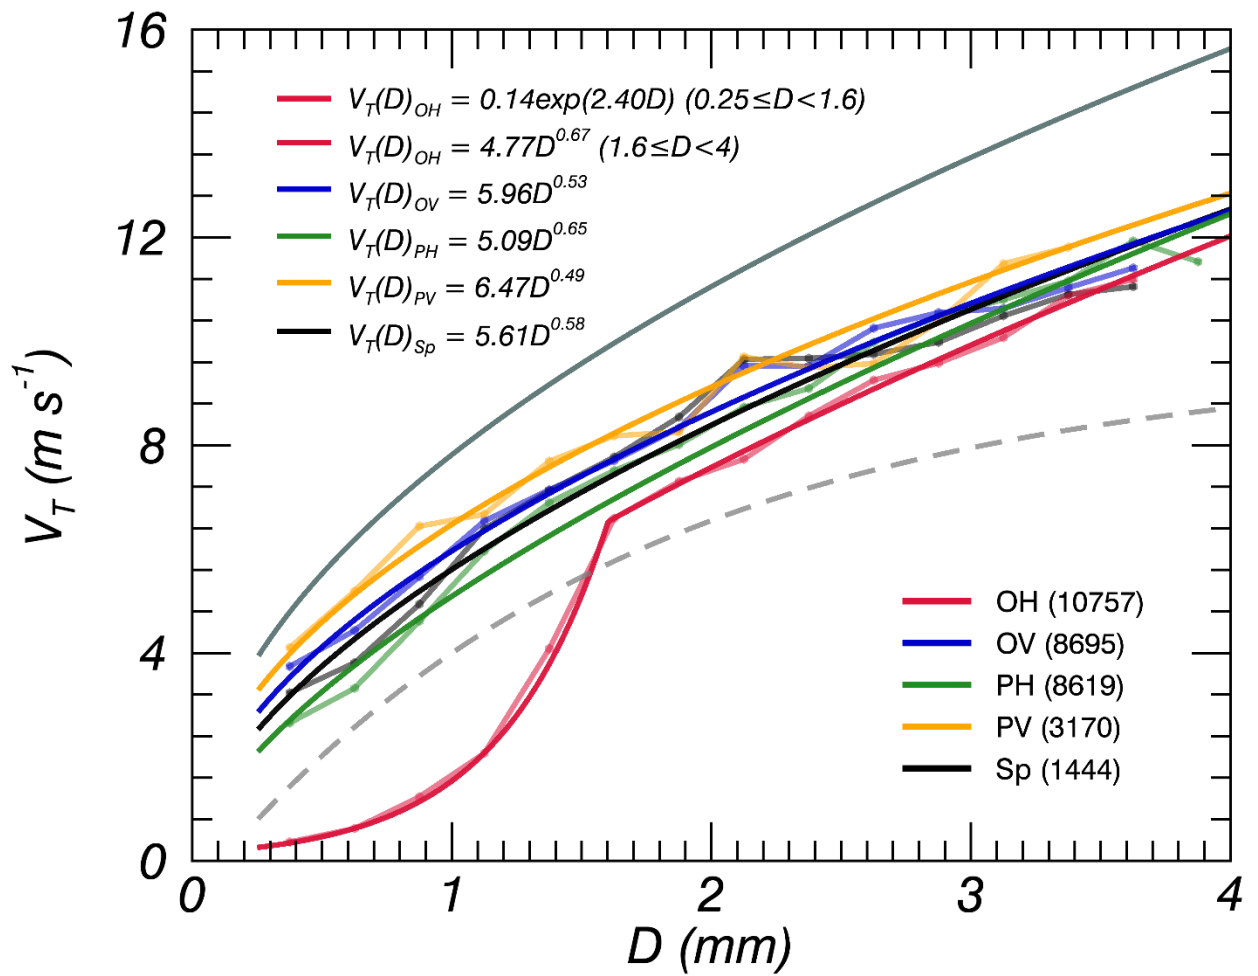

919

920 Figure 9. Distribution of median  $V_T$  values after applying a 60%  $V_T$  quality control (QC) threshold  
 921 for each particle shape type. The grey solid and broken lines show the relationships of volcanic ash  
 922 particles and raindrops suggested by Bonadonna et al. (2011) and Atlas et al. (1971), respectively.

923

924

925

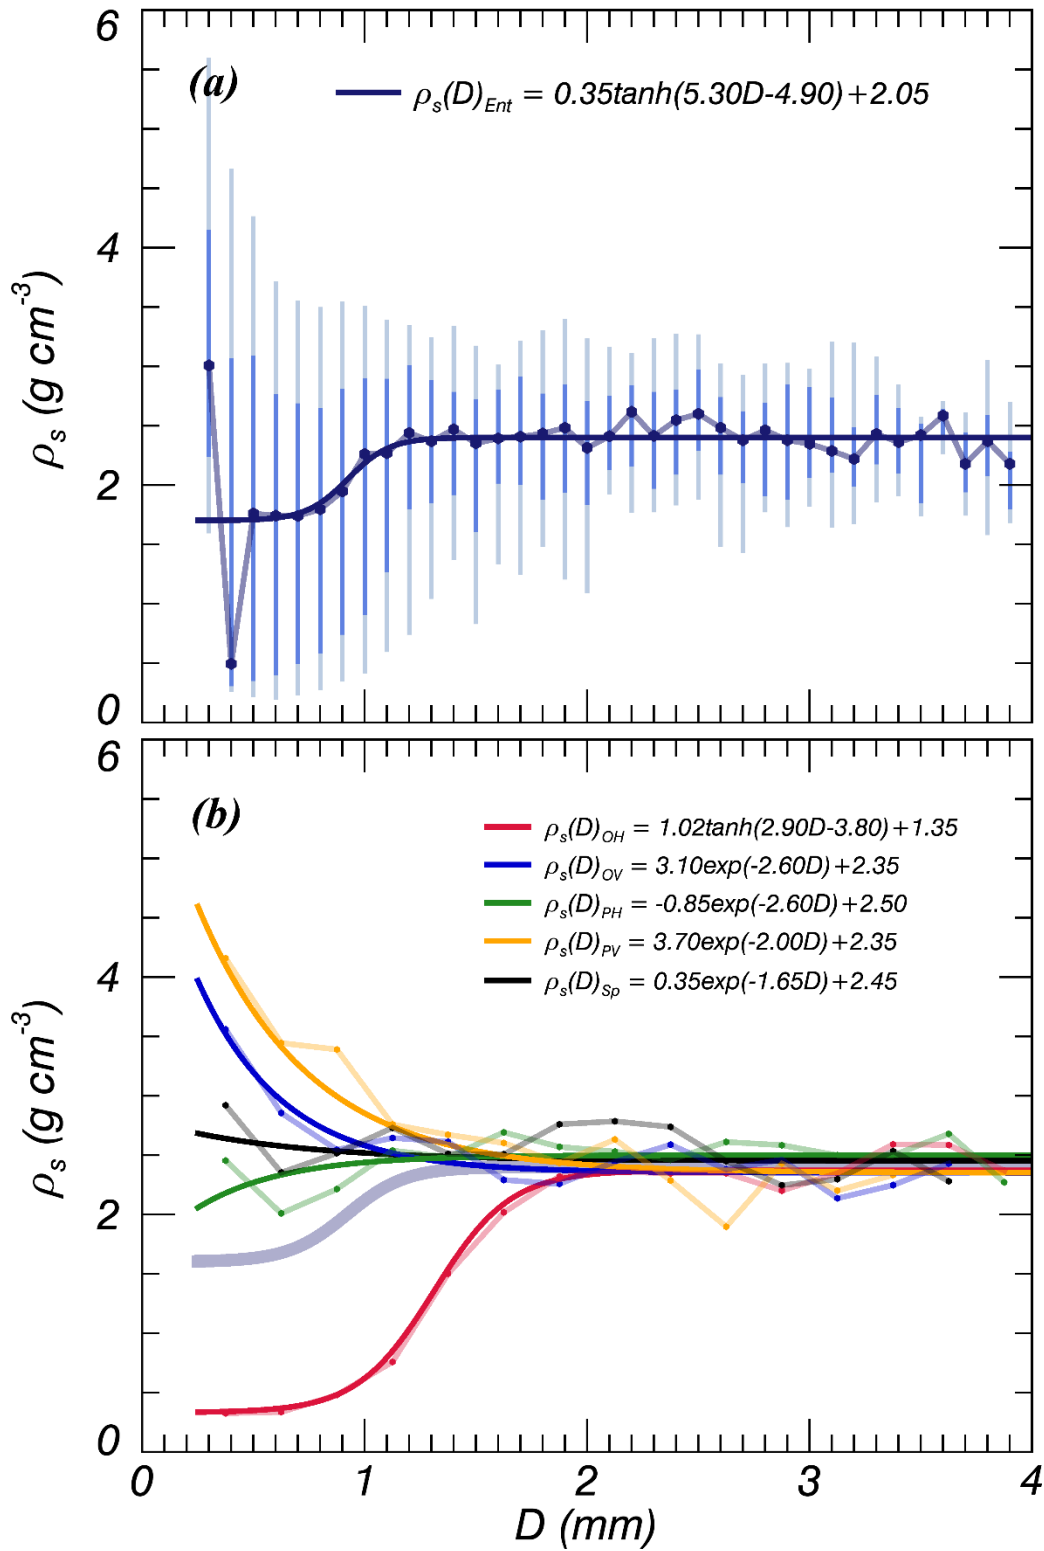

926

927 Figure 10. Distribution of (a) quartile and (b) median particle density ( $\rho_s$ ) values after applying the

928 60%  $V_T$  QC threshold for all, and each individual, particle shape type, respectively.

929

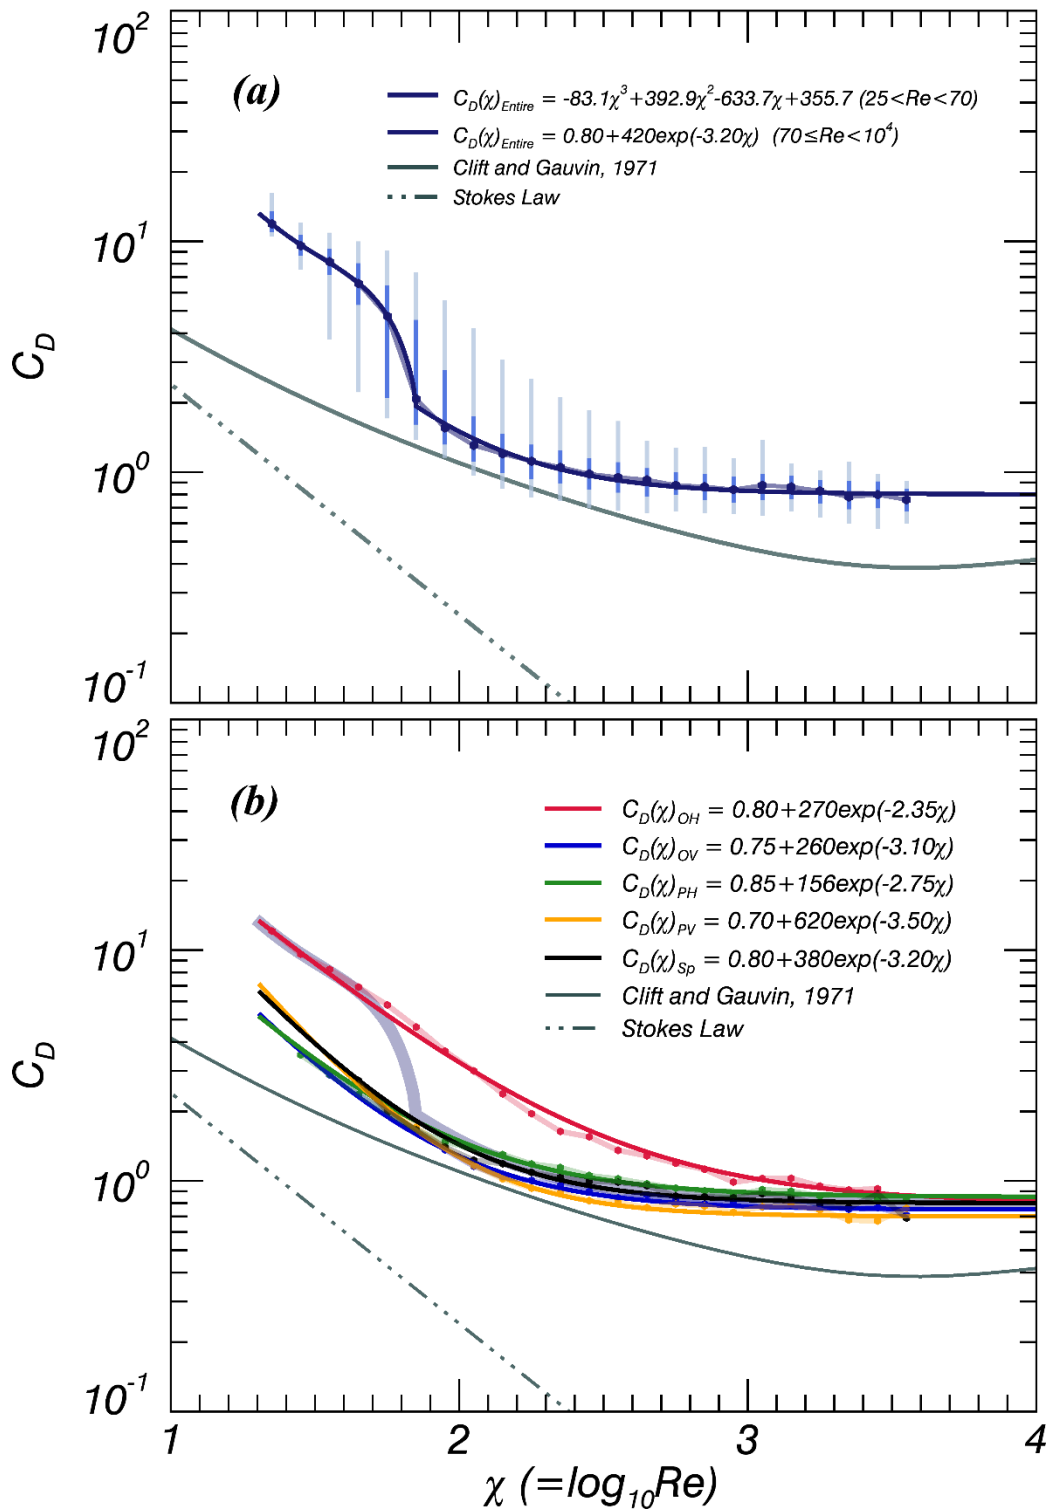

930

931

932

933

934

Figure 11. Same as Fig. 10 but for Reynolds number ( $Re$ ) and drag coefficient ( $C_D$ ). The grey solid and broken lines in (a) are the relationships of spheres suggested by Clift and Gauvin (1971) and Stokes (1851), respectively.

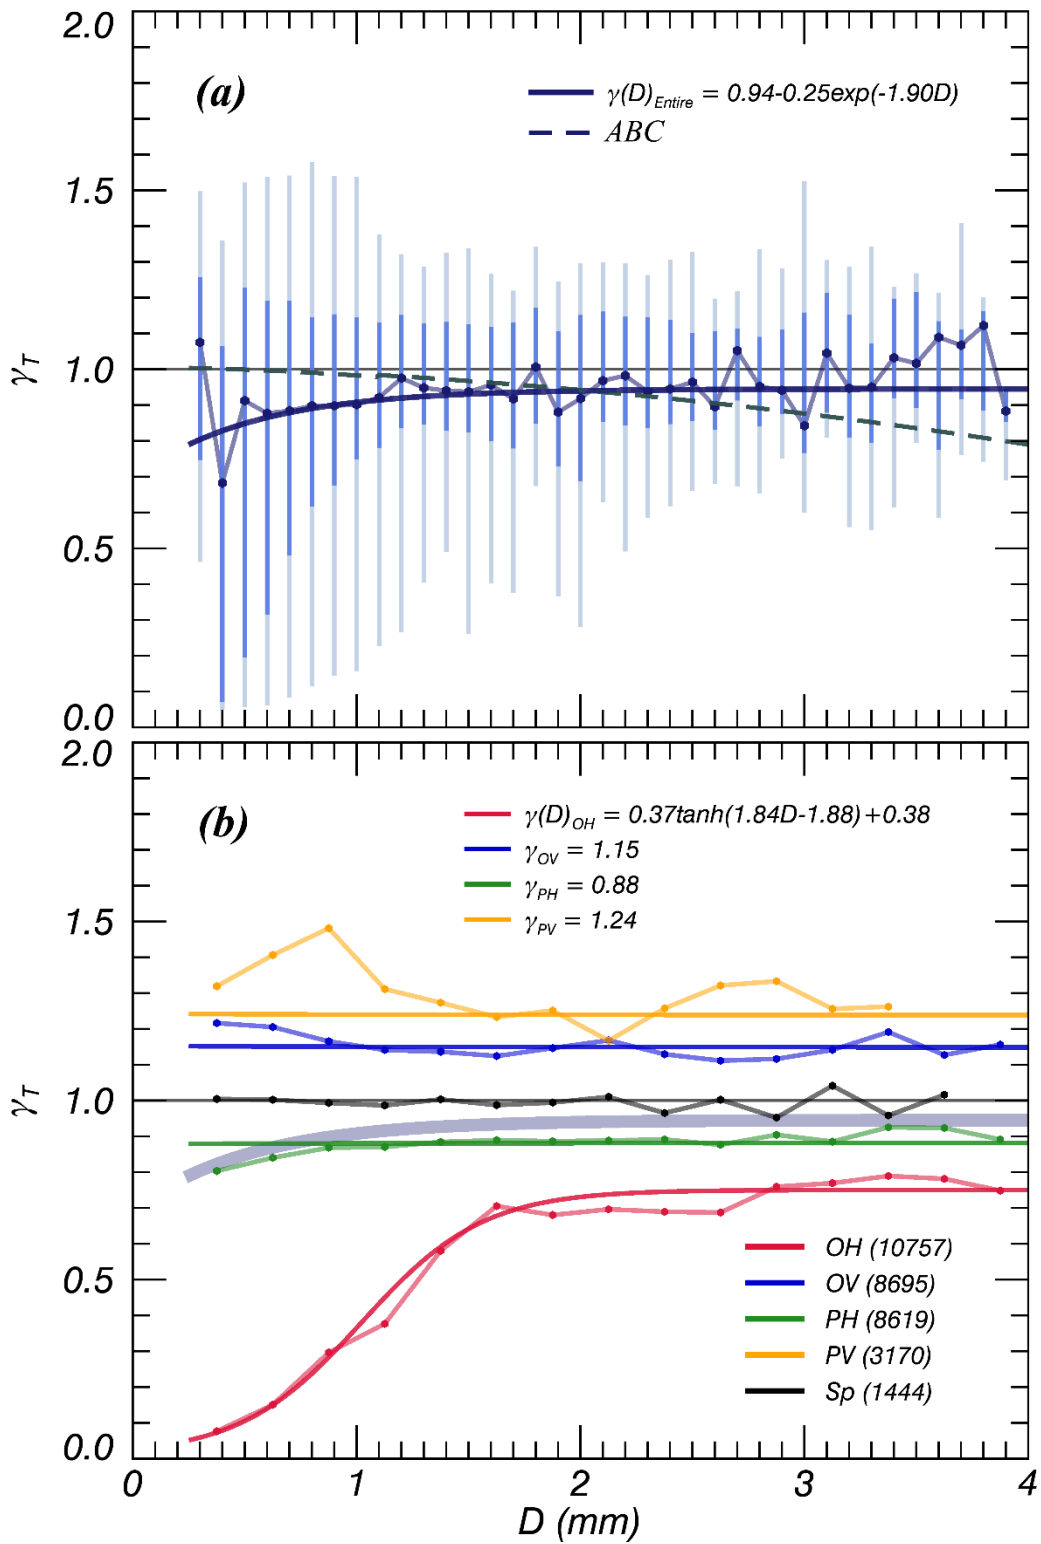

935

936 Figure 12. Same as Fig. 10 but for  $\gamma$ . The grey broken line (ABC) in (a) shows the relationships of  
 937  $\gamma$  for raindrops suggested by Beard and Chuang (1987) and Andsager et al. (1999).

938

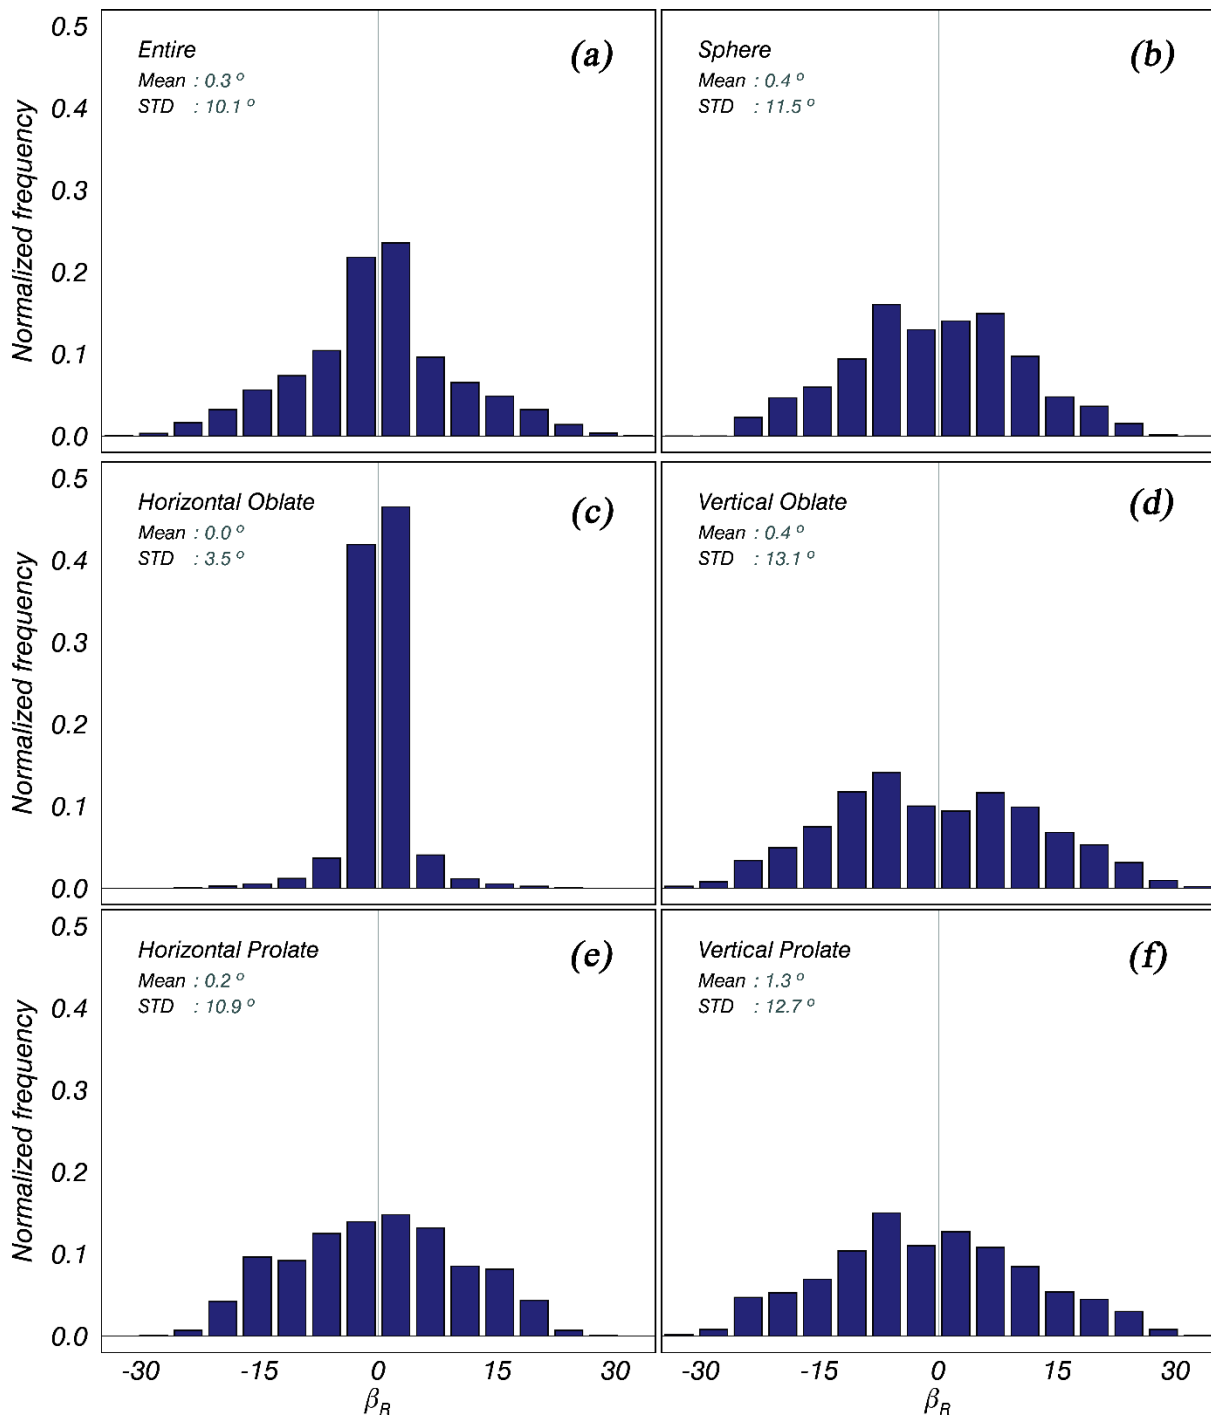

939

940

941

942

Figure 13. Histograms of representative canting angle ( $\beta_R$ ) for each particle shape type, including the data for all particles.

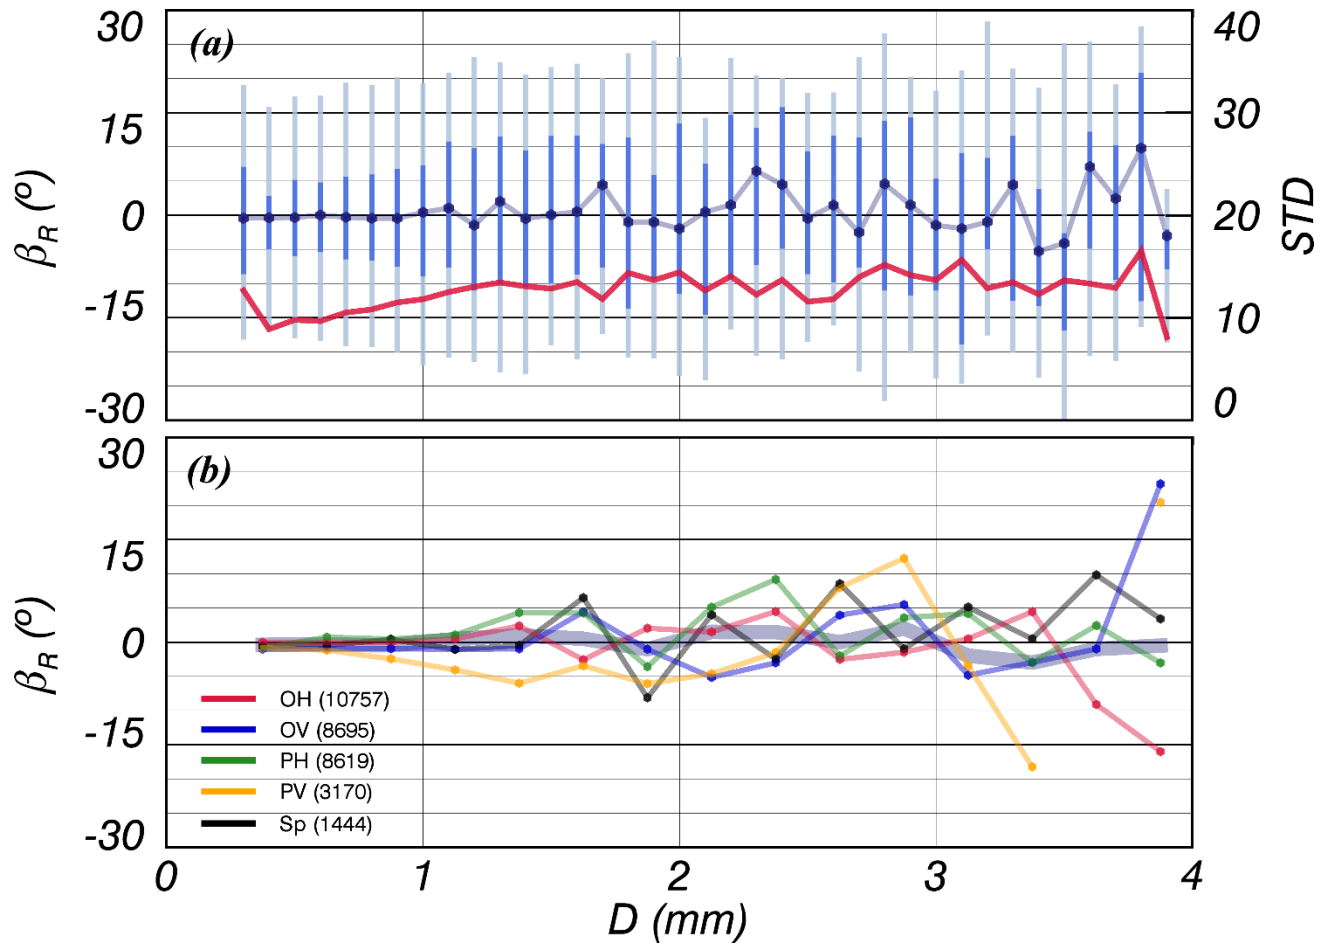

943

944 Figure 14. Distribution of  $\beta_R$  with  $D$  for each particle shape type including the data for all particles.

945 The red solid line indicates the standard deviation.

946

947

948



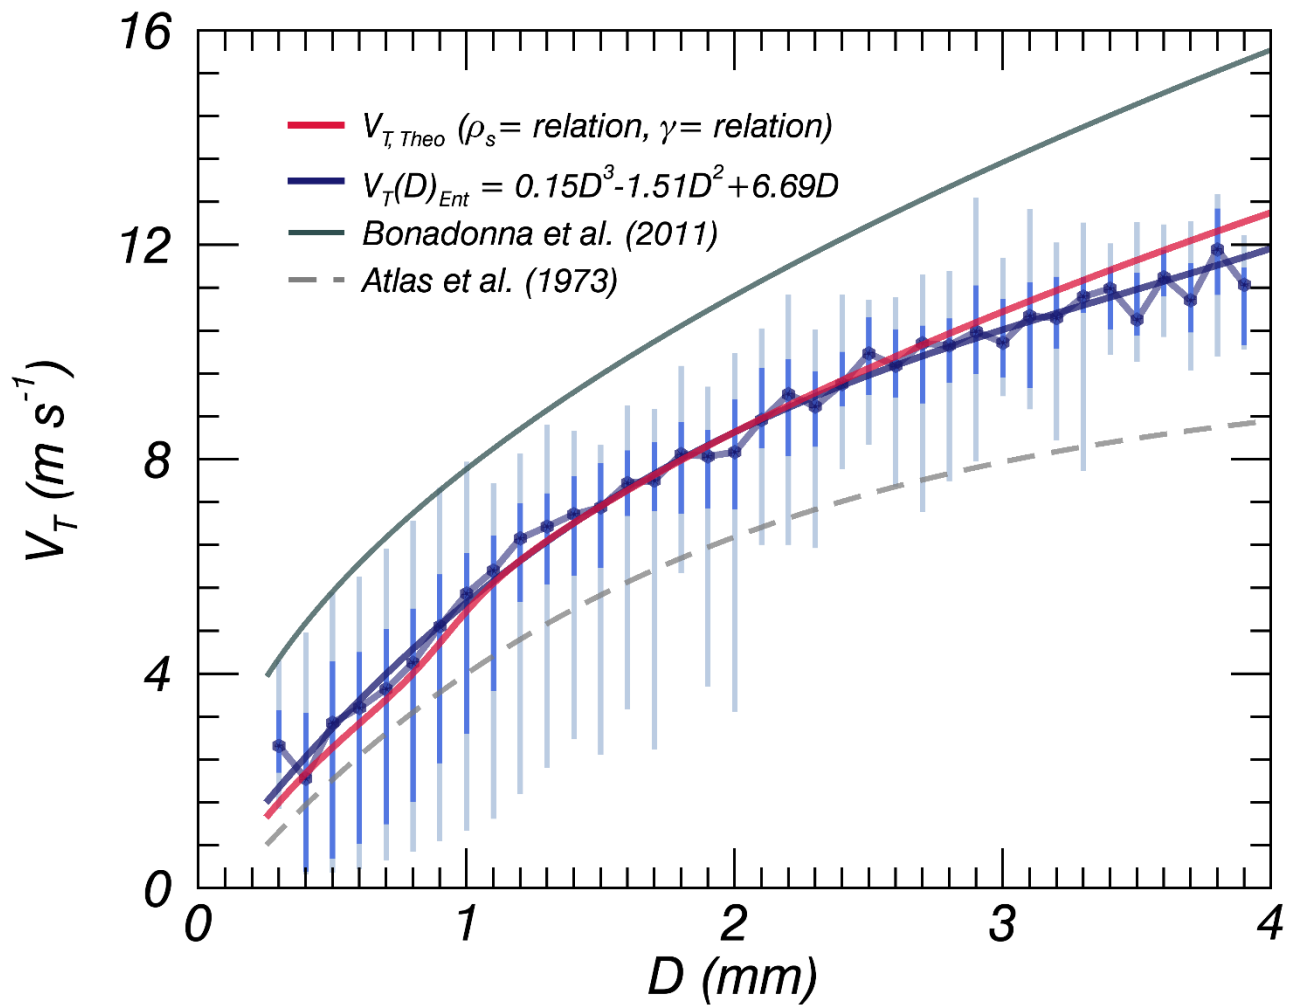

949

950 Figure 15. The  $V_T$  quartiles after applying the 60%  $V_T$  QC threshold for all, and each individual,  
 951 particle shape type, respectively. Grey solid and broken lines in (a) are the relationships of volcanic  
 952 ash particles and raindrops suggested by Bonadonna et al. (2011) and Atlas et al. (1971), respectively.  
 953 The red solid line indicates the  $V_{T, \text{Ref}}$  relationships of  $\gamma$  and particle density suggested by the present  
 954 study.

955

956

957

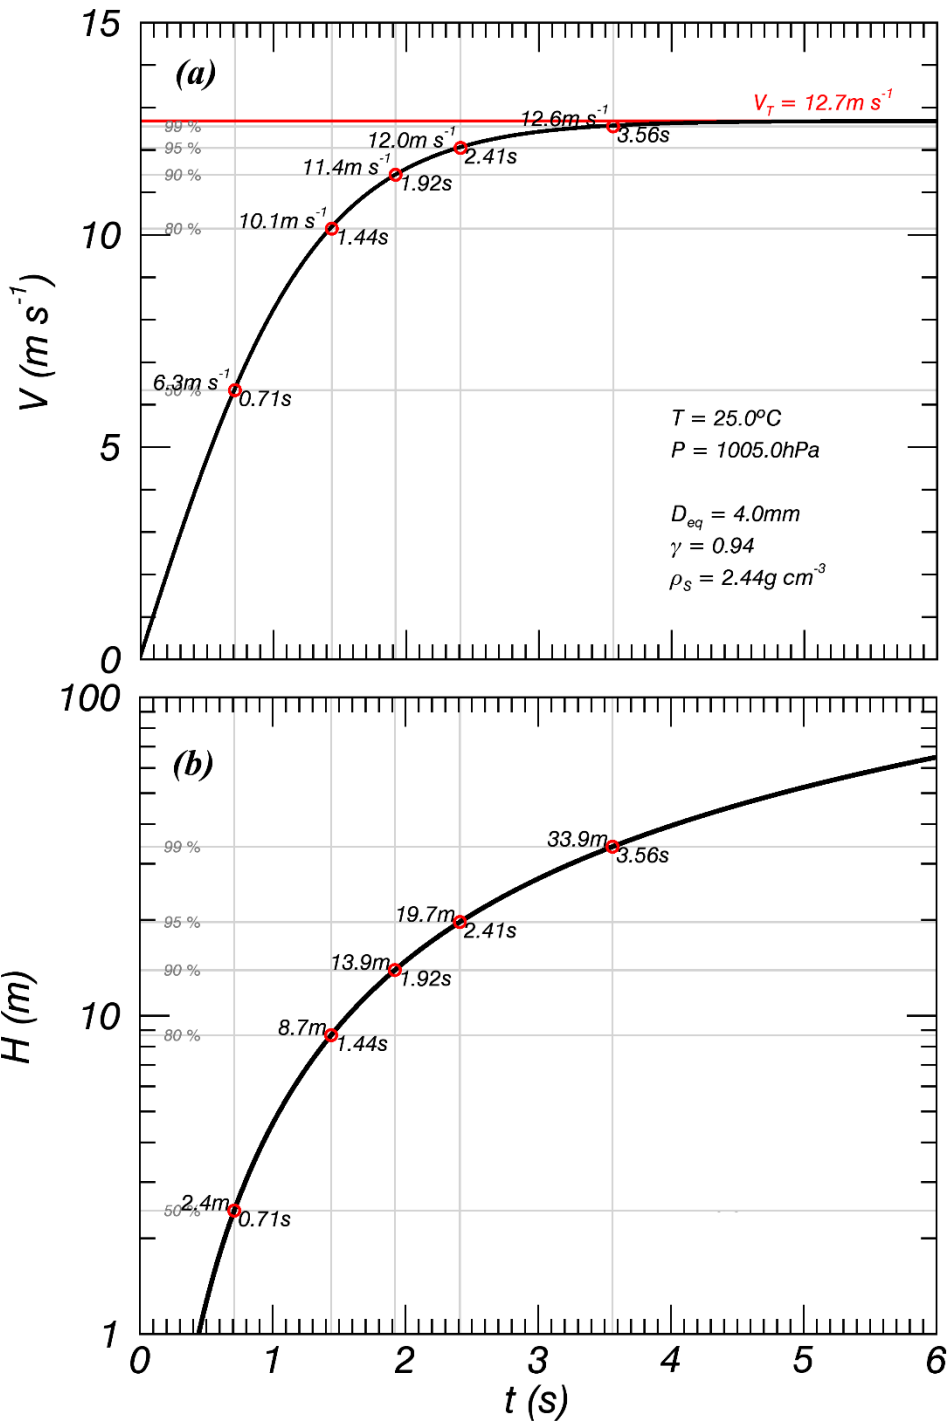

958

959 Figure A1. Theoretical (a) fall velocity and (b) falling height for a sphere with  $D = 4 \text{ mm}$ ,  
 960 considering the surface roughness coefficient of the volcanic ash particle ( $1.07^{-1}$ ) relative to its fall  
 961 velocity (Bagheri and Bonadonna, 2016).

962

963 **Tables**

964

965 Table 1. Particle number by particle shape type after applying quality controls and ash particle  
 966 classification criteria.

| <b>Type</b> | <b>Description</b> | <b>Classification conditions</b>                                                     | <b>Data number (%)</b> |
|-------------|--------------------|--------------------------------------------------------------------------------------|------------------------|
| All         | All                | .                                                                                    | 62,953 (100)           |
| OH          | Horizontal oblate  | $\gamma_{T1(2)} < 0.9$<br>$ \gamma_{T1} - \gamma_{T2}  \leq 0.1\gamma_T$             | 36,125 (57.38)         |
| OV          | Vertical oblate    | $0.9 \leq \gamma_{T1(2)} \leq 1.1,$<br>$\gamma_{T2(1)} > 1.1$                        | 10,000 (15.88)         |
| PH          | Horizontal prolate | $ \gamma_{T1} - \gamma_{T2}  > 0.1\gamma_T$                                          | 11,412 (18.13)         |
| PV          | Vertical prolate   | $\gamma_{T1(2)} > 1.1$<br>$ \gamma_{T1} - \gamma_{T2}  \leq 0.1\gamma_T$             | 3,601 (5.72)           |
| Sp          | Sphere             | $0.9 \leq \gamma_{T1(2)} \leq 1.1$<br>$ \gamma_{T1} - \gamma_{T2}  \leq 0.1\gamma_T$ | 1,815 (2.88)           |

967

968 Table 2. Information on the collected volcanic ash particles.

| <b>Data</b> | <b>Collection date</b> | <b>Re-analysis time<br/>(June 18, 2014)</b> | <b>Re-analysis<br/>method</b> |
|-------------|------------------------|---------------------------------------------|-------------------------------|
| <b>A</b>    | Dec. 1–31 2008         | 10:00–12:34 (154 min)                       | Size by size<br>(phi scale)   |
| <b>B</b>    | Mar. 1–31 2010         | 13:43–14:53 (70 min)                        | Size by size<br>(phi scale)   |
| <b>C</b>    | Feb. 28, 2014          | 15:11–16:17 (66 min)                        | Mixed                         |
| <b>D</b>    | Mar. 31, 2014          | 16:19–17:05 (46 min)                        | Mixed                         |
| <b>E</b>    | Apr. 30 2014           | 17:07–18:00 (53 min)                        | Mixed                         |

969

970

971 Table 3. Relationships of terminal velocity with the number of data points, the value of the  
 972 correlation coefficient (CC) and the root mean square error (RMSE) after applying the 60%  $V_T$  QC  
 973 threshold for each particle shape type.

| Type       | Data number (%) | Relationship ( $0.25 < D \text{ (mm)} \leq 4$ )                                                    | CC   | RMSE |
|------------|-----------------|----------------------------------------------------------------------------------------------------|------|------|
| <b>All</b> | 32685 (100)     | $V_T(D) = 0.15D^3 - 1.51D^2 + 6.69D$                                                               | 0.56 | 1.22 |
| <b>OH</b>  | 10757 (34.12)   | $V_T(D) = 0.14\exp(2.40D)$ ( $0.25 \leq D < 1.6$ )<br>$V_T(D) = 4.77D^{0.67}$ ( $1.6 \leq D < 4$ ) | 0.94 | 0.46 |
| <b>OV</b>  | 8695 (26.60)    | $V_T(D) = 5.96D^{0.53}$                                                                            | 0.75 | 0.85 |
| <b>PH</b>  | 8619 (26.36)    | $V_T(D) = 5.09D^{0.65}$                                                                            | 0.87 | 0.74 |
| <b>PV</b>  | 3170 (9.69)     | $V_T(D) = 6.47D^{0.49}$                                                                            | 0.71 | 0.96 |
| <b>Sp</b>  | 1444 (4.41)     | $V_T(D) = 5.61D^{0.56}$                                                                            | 0.91 | 0.78 |

974

975

976

977

978

979
